# Supplementary material for: The detection and identification of dengue virus serotypes with quantum dot and AuNP regulated localized surface plasmon resonance
Source: PubMed Central journal article supplement — Nanoscale Adv. 2019 Dec 13;2(2):699–709. doi: 10.1039/c9na00763f (PMC9417854; doi:10.1039/c9na00763f), 2019-12-13
Supplement: NA-002-C9NA00763F-s001.pdf [file NA-002-C9NA00763F-s001.pdf]

## Electronic Supplementary Information

# Detection and identification of dengue virus serotype altering quantum dots and AuNP regulated localized surface plasmon resonance

Ankan Dutta Chowdhury<sup>a</sup>, Kenshin Takemura<sup>b</sup>, Indra Memdi Khorish<sup>c</sup>, Fahmida Nasrin<sup>b</sup>, Mya Myat Ngwe Tun<sup>d</sup>, Kouichi Morita<sup>d</sup>, Enoch Y. Park<sup>a,b,c,\*</sup>

<sup>a</sup> Research Institute of Green Science and Technology, Shizuoka University, 836 Ohya Suruga-ku, Shizuoka 422-8529, Japan

<sup>b</sup> Department of Bioscience, Graduate School of Science and Technology, Shizuoka University, 836 Ohya Suruga-ku, Shizuoka 422-8529, Japan

<sup>c</sup> College of Agriculture, Graduate School of Integrated Science and Technology, Shizuoka University, 836 Ohya Suruga-ku, Shizuoka 422-8529, Japan

<sup>d</sup> Department of Virology, Institute of Tropical Medicine, Nagasaki University, Sakamoto 1-12-4, Nagasaki City 852-8523, Japan

E-mail addresses:

ankan.dutta.chowdhury@shizuoka.ac.jp (ADC)

takemura.kenshin.16@shizuoka.ac.jp (KT)

indra.memdi.khoris.17@shizuoka.ac.jp (IMK)

fahmida.nasrin.17@shizuoka.ac.jp (FN)

myamyat@tm.nagasaki-u.ac.jp (MMNT)

moritak@nagasaki-u.ac.jp (KM)

park.enoch@shizuoka.ac.jp (EYP)

**Table S1.** Total genome of four DENV serotypes and their selected region for designing the synthetic analytes:

Dengue 1

AGTTGTTAGTCTACGTGGACCGACAAGAACAGTTTCGAATCGGAAGCTTGCTTAACG  
TAGTTCTAACAGTTTTTTATTAGAGAGCAGATCTCTGATGAACAACCAACGGAAAAA  
GACGGGTCGACCGTCTTTCAATATGCTGAAACGCGCGAGAAACCGCGTGTCAACTGT  
TTCACAGTTGGCGAAGAGATTCTCAAAGGATTGCTTTCAGGCCAAGGACCCATGA  
AATTGGTGATGGCTTTTATAGCATTCTAAGATTTCTAGCCATACCTCCAACAGCAG  
GAATTTTGGCTAGATGGGGCTCATTCAAGAAGAATGGAGCGATCAAAGTGTTACGG  
GGTTTCAAGAAAGAAATCTCAAACATGTTGAACATAATGAACAGGAGGAAAAGATC  
TGTGACCATGCTCCTCATGCTGCTGCCACAGCCCTGGCGTTCATCTGACCACCCG  
AGGGGGAGAGCCGCACATGATAGTTAGCAAGCAGGAAAGAGGAAAATCACTTTTGT  
TTAAGACCTCTGCAGGTGTCAACATGTGCACCCTTATTGCAATGGATTTGGGAGAGT  
TATGTGAGGACACAATGACCTACAAATGCCCCCGGATCACTGAGACGGAACCAGAT  
GACGTTGACTGTTGGTGCAATGCCACGGAGACATGGGTGACCTATGGAACATGTTCT  
CAAACCTGGTGAACACCGACGAGACAAACGTTCCGTCGCACTGGCACCACACGTAGG  
GCTTGGTCTAGAAACAAGAACCGAAACGTGGATGTCCTCTGAAGGCGCTTGGAAC  
AAATACAAAAGTGGAGACCTGGGCTCTGAGACACCCAGGATTCACGGTGATAGCC  
CTTTTTCTAGCACATGCCATAGGAACATCCATCACCCAGAAAGGGATCATTTTTATTT  
TGCTGATGCTGGTAACTCCATCCATGGCCATGCGGTGCGTGGGAATAGGCAACAGA  
GACTTCGTGGAAGGACTGTCAGGAGCTACGTGGGTGGATGTGGTACTGGAGCATGG  
AAGTTGCGTCACTACCATGGCAAAAGACAAACCAACACTGGACATTGAACTCTTGA  
AGACGGAGGTCACAAACCCTGCCGTCCTGCGCAAACCTGTGCATTGAAGCTAAAATA  
TCAAACACCACCACCGATTCGAGATGTCCAACACAAGGAGAAGCCACGCTGGTGGA  
AGAACAGGACACGAACCTTGTGTGTCGACGAACGTTTCGTGGACAGAGGCTGGGGCA  
ATGGTTGTGGGCTATTCGGAAAAGGTAGCTTAATAACGTGTGCTAAGTTTAAGTGTG  
TGACAAAACCTGGAAGGAAAGATAGTCCAATATGAAAACCTTAAAATATTCAGTGATA  
GTCACCGTACACACTGGAGACCAGCACCAAGTTGGAAATGAGACCACAGAACATGG  
AACAACTGCAACCATAACACCTCAAGCTCCCACGTCGGAAATACAGCTGACAGACT  
ACGGAGCTCTAACATTGGATTGTTACCTAGAACAGGGCTAGACTTTAATGAGATGG  
TGTTGTTGACAATGAAAAAAAAAATCATGGCTCGTCCACAAACAATGGTTTCTAGACT  
TACCACTGCCTTGGACCTCGGGGGCTTCAACATCCCAAGAGACTTGGAATAGACAA  
GACTTGCTGGTCACATTTAAGACAGCTCATGCAAAAAGCAGGAAGTAGTCGTA  
AGGATCACAAGAAGGAGCAATGCACACTGCGTTGACTGGAGCGACAGAAATCCAAA  
CGTCTGGAACGACACAATTTTTGCAGGACACCTGAAATGCAGATTAAAATGGAT  
AAACTGATTTTAAAAGGGATGTCATATGTAATGTGCACAGGGTCATTCAAGTTAGAG

AAGGAAGTGGCTGAGACCCAGCATGGAAGTGTCTAGTGCAGGTAAATACGAAGG  
AACAGATGCACCATGCAAGATCCCCTTCTCGTCCCAAGATGAGAAGGGAGTAACCC  
AGAATGGGAGATTGATAACAGCCAACCCCATAGTCACTGACAAAGAAAAACCAGTC  
AACATTGAAGCGGAGCCACCTTTTGGTGAGAGCTACATTGTGGTAGGAGCAGGTGA  
AAAAGCTTTGAAACTAAGCTGGTTCAAGAAGGGAAGCAGTATAGGGAAAATGTTTG  
AAGCAACTGCCCGTGGAGCACGAAGGATGGCCATCCTGGGAGACACTGCATGGGAC  
TTCGGTTCTATAGGAGGGGTGTTACGTCTGTGGGAAAAGTACTGATACACCAGATTTTT  
GGGACTGCGTATGGAGTTTTGTTTACGCGGTGTTTCTTGGACCATGAAGATAGGAATA  
GGGATTCTGCTGACATGGCTAGGATTAAGTCAAGGAGCACGTCCCTTTCAATGACG  
TGTATCGCAGTTGGCATGGTCACACTGTACCTAGGAGTCATGGTTCAGGCGGACTCG  
GGATGTGTAATCAACTGGAAAGGCAGAGAACTCAAATGTGGAAGCGGCATTTTTGT  
CACCAATGAAGTCCACACCTGGACAGAGCAATATAAATTCCAGGCCGACTCCCCTA  
AGAGACTATCAGCGGCCATTGGGAAGGCATGGGAGGAGGGTGTGTGTGGAATTCGA  
TCAGCCACTCGTCTCGAGAACATCATGTGGAAGCAAATATCAAATGAATTAACCA  
CATCTTACTTGAAAATGACATGAAATTTACAGTGGTTCGTAGGAGACGTTAGTGGAAAT  
CTTGGCCCAAGGAAAGAAAATGATTAGGCCACAACCCATGGAACACAAATACTCGT  
GGAAAAGCTGGGGAAAAGCCAAAATCATAGGAGCAGATGTACAGAATACCACCTTC  
ATCATCGACGGCCCAAACACCCCAAGAAATGCCCTGATAACCAAAGAGCATGGAACAT  
TTGGGAAGTTGAAGACTATGGATTTGGAATTTTACGACAAACATATGGTTGAAATT  
GCGTGAATCCTACACTCAAGTGTGTGACCACCGGCTAATGTCAGCTGCCATCAAGGA  
TAGCAAAGCAGTCCATGCTGACATGGGGTACTGGATAGAAAGTGAAAAGAACGAGA  
CTTGAAGTTGGCAAGAGCCTCCTTCATAGAAGTTAAGACATGCATCTGGCCAAAAT  
CCCACACTCTATGGAGCAATGGAGTCTTGGAAAGTGAGATGATAATCCCAAAGATA  
TATGGAGGACCAATATCTCAGCACAACACTACAGACCAGGATATTTACACAAACAGC  
AGGGCCGTGGCACTTGGGCAAGTTAGAAGTACTGATTTTGGATTTATGTGAAGGTACCAC  
TGTTGTTGTGGATGAACATTGTGGAATCGAGGACCATCTCTTAGAACCACAACAGT  
CACAGGAAAGACAATCCATGAATGGTGTGTAGATCTTGCACGTTACCCCCCTACG  
TTTCAAAGGAGAAGACGGGTGCTGGTACGGCATGGAAATCAGACCAGTCAAGGAGA  
AGGAAGAGAACCTAGTTAAGTCAATGGTCTCTGCAGGGTCAGGAGAAGTGGACAGT  
TTTTCACTAGGACTGCTATGCATATCAATAATGATCGAAGAGGTAATGAGATCCAGA  
TGGAGCAGAAAATGCTGATGACTGGAACATTGGCTGTGTTCCCTCCTTCTACAATG  
GGACAATTGACATGGAATGATCTGATCAGGCTATGTATCATGGTTGGAGCCAACGCT  
TCAGACAAGATGGGGATGGGAACAACGTACCTAGCTTTGATGGCCACTTTCAGAAT  
GAGACCAATGTTTCGACGTCGGGCTACTGTTTCGCAGATTAACATCTAGAGAAGTTCT  
TCTTCTTACAGTTGGATTGAGTCTGGTGGCATCTGTAGAACTACCAAATTCCTTAGA  
GGAGCTAGGGGATGGACTTGCAATGGGCATCATGATGTTGAAATTAAGTACTGACTGATTT  
TCAGTCACATCAGCTATGGGCTACCTTGCTGTCTTAAACATTTGTCAAAAACAACTTTT  
TCATTGCACTATGCATGGAAGACAATGGCTATGATACTGTCAATTGTATCTCTCTCC  
CTTTATGCCTGTCCACGACTTCTCAAAAACAACATGGCTTCCGGTGTGCTGGGAT  
CTCTTGGATGCAACCCTAACCATGTTTCTTATAACAGAAAACAACAAATCTGGGGAA

GGAAAAGCTGGCCTCTCAATGAAGGAATTATGGCTGTTGGAATAGTTAGCATTCTTC  
TAAGTTCACTTCTCAAGAATGATGTGCCACTAGCTGGCCACTAATAGCTGGAGGCA  
TGCTAATAGCATGTTATGTCATATCTGGAAGCTCGGCCGATTTATCACTGGAGAAAG  
CGGCTGAGGTCTCCTGGGAAGAAGAAGCAGAACACTCTGGTGCCTCACACAACATA  
CTAGTGGAGGTCCAAGATGATGGAACCATGAAGATAAAGGATGAAGAGAGAGATG  
ACACACTCACCATTCTCCTCAAAGCAACTCTGCTAGCAATCTCAGGGGTATACCCAA  
TGTC AATACCGGCGACCCTCTTTGTGTGGTATTTTTGGCAGAAAAAGAAACAGAGAT  
CAGGAGTGCTATGGGACACACCCAGCCCTCCAGAAGTGGAAAGAGCAGTCCTTGAT  
GATGGCATTATAGAATTCTCCAAAGAGGATTGTTGGGCAGGTCTCAAGTAGGAGTA  
GGAGTTTTTCAAGAAGGCGTGTTCCACACAATGTGGCACGTCACCAGGGGAGCTGTC  
CTCATGTACCAAGGGAAGAGACTGGAACCAAGTTGGGCCAGTGTCAAAAAGACTT  
GATCTCATATGGAGGAGGTTGGAGGTTTCAAGGATCCTGGAACGCGGGAGAAGAAG  
TGCAGGTGATTGCTGTTGAACCGGGGAAGAACCCCAAAAATGTACAGACAGCGCCG  
GGTACCTTCAAGACCCCTGAAGGCGAAGTTGGAGCCATAGCTCTAGACTTTAAACCC  
GGCACATCTGGATCTCCTATCGTGAACAGAGAGGGAAAAATAGTAGGTCTTTATGG  
AAATGGAGTGGTGACAACAAGTGGTACCTACGTCAGTGCCATAGCTCAAGCTAAAG  
CATCACAAGAAGGGCCTCTACCAGAGATTGAGGACGAGGTGTTTAGGAAAAGAAAC  
TTAACAATAATGGACCTACATCCAGGATCGGGAAAAACAAGAAGATACCTTCCAGC  
CATAGTCCGTGAGGCCATAAAAAGAAAGCTGCGCACGCTAGTCTTAGCTCCCACAA  
GAGTTGTCGCTTCTGAAATGGCAGAGGGCGCTCAAGGGAATGCCAATAAGGTATCAG  
ACAACAGCAGTGAAGAGTGAACACACGGGAAAGGAGATAGTTGACCTTATGTGTCA  
CGCCACTTTCACTATGCGTCTCCTGTCTCCTGTGAGAGTTCCCAATTATAATATGATT  
ATCATGGATGAAGCACATTTTACCGATCCAGCCAGCATAGCAGCCAGAGGGTATAT  
CTCAACCCGAGTGGGTATGGGTGAAGCAGCTGCGATTTTCATGACAGCCACTCCCC  
CGGATCGGTGGAGGCCTTCCACAGAGCAATGCAGTTATCCAAGATGAGGAAAGAG  
ACATTCCTGAAAGATCATGGAACTCAGGCTATGACTGGATCACTGATTTCCAGGTA  
AAACAGTCTGGTTTGTCCAAGCATCAAATCAGGAAATGACATTGCCAACTGTTTAA  
GAAAGAATGGGAAACGGGTGGTCCAATTGAGCAGAAAAACTTTTGACACTGAGTAC  
CAGAAAACAAAAAATAACGACTGGGACTATGTTGTCACAACAGACATATCCGAAAT  
GGGAGCAAACCTCCGAGCCGACAGGGTAATAGACCCGAGGCGGTGCCTGAAACCGG  
TAATACTAAAAGATGGCCAGAGCGTGTCATTCTAGCCGGACCGATGCCAGTGACT  
GTGGCTAGCGCCGCCAGAGGAGAGGAAGAATTGGAAGGAACCAAAAATAAGGAAG  
GCGATCAGTATATTTACATGGGACAGCCTCTAAACAATGATGAGGACCACGCCCAT  
GGACAGAAGCAAAAATGCTCCTTGACAACATAAACACACCAGAAGGGATTATCCCA  
GCCCTCTTTGAGCCGGAGAGAGAAAAGAGTGCAGCAATAGACGGGGAATACAGACT  
ACGGGGTGAAGCGAGGAAAACGTTTCGTGGAGCTCATGAGAAGAGGAGATCTACCTG  
TCTGGCTATCTACAAAGTTGCCTCAGAAGGCTTCCAGTACTCCGACAGAAGGTGGT  
GCTTTGATGGGGAAAGGAACAACCAGGTGTTGGAGGAGAACATGGACGTGGAGATC  
TGGACAAAAGAAGGAGAAAGAAAGAAACTACGACCCCGCTGGCTGGATGCCAGAA  
CATACTCTGACCCACTGGCTCTGCGCGAATTCAAAGAGTTCGCAGCAGGAAGAAGA

AGCGTCTCAGGTGACCTAATATTAGAAATAGGGAAACTTCCACAACATTTAACGCA  
AAGGGCCCAGAACGCCTTGGACAATCTGGTTATGTTGCACAACTCTGAACAAGGAG  
GAAAAGCCTATAGACACGCCATGGAAGA ACTACCAGACACCATAGAAACGTTAATG  
CTCCTAGCTTTGATAGCTGTGCTGACTGGTGGAGTGACGTTGTTCTTCTATCAGGAA  
GGGGTCTAGGAAAACATCCATTGGCCTACTCTGCGTGATTGCCTCAAGTGC ACTGT  
TATGGATGGCCAGTGTGGAACCCCATGGATAGCGGCCTCTATCATACTGGAGTTCT  
TTCTGATGGTGTGCTTATTCCAGAGCCGGACAGACAGCGCACTCCACAAGACAACC  
AGCTAGCATACTGGTGTAGGTCTGTTATTCATGATATTGACAGTGGCAGCCAATG  
AGATGGGATTACTGGAAACCACAAAGAAGGACCTGGGGATTGGTCATGCAGCTGCT  
GAAAACCACCATCATGCTGCAATGCTGGACGTAGACCTACATCCAGCTTCAGCCTGG  
ACTCTCTATGCAGTGGCCACAACAATTATCACTCCCATGATGAGACACACAATTGAA  
AACACAACGGCAAATATTTCCCTGACAGCTATTGCAAACCAGGCAGCTATATTGATG  
GGACTTGACAAGGGATGGCCAATATCAAAGATGGACATAGGAGTTCCACTTCTCGC  
CTTGGGGTGCTATTCTCAGGTGAACCCGCTGACGCTGACAGCGGGCGGTATTGATGCT  
AGTGGCTCATTATGCCATAATTGGACCCGGACTGCAAGCAAAGCTACTAGAGAAG  
CTCAAAAAGGACAGCAGCCGGAATAATGAAAAACCCA ACTGTCGACGGGATCGTT  
GCAATAGATTTGGACCCTGTGGTTTACGATGCAAAATTTGAAAACAGCTAGGCCA  
AATAATGTTGTTGATACTTTGCACATCACAGATCCTCCTGATGCGGACCACATGGGC  
CTTGTGTGAATCCATCACACTAGCCACTGGACCTCTGACTACGCTTTGGGAGGGATC  
TCCAGGAAAATTCTGGAACACCACGATAGCGGTGTCCATGGCAAACATTTTTAGGG  
GAAGTTATCTAGCAGGAGCAGGTCTGGCCTTTTCATTAATGAAATCTCTAGGAGGAG  
GTAGGAGAGGCACGGGAGCCCAAGGGGAAACACTGGGAGAAAATGGAAAAGACA  
GCTAAACCAATTGAGCAAGTCAGAATTCAACACTTACAAAAGGAGTGGGATTATAG  
AGGTGGATAGATCTGAAGCCAAAGAGGGGTTAAAAAGAGGAGAAACGACTAAACA  
CGCAGTGTGAGAGGAACGGCCAAACTGAGGTGGTTTGTGGAGAGGAACCTTGTGA  
AACCAGAAGGGAAAGTCATAGACCTCGGTTGTGGAAGAGGTGGCTGGTCATATTAT  
TGCGCTGGGCTGAAGAAAGTCACAGAAGTGAAAGGATACACGAAAGGAGGACCTG  
GACATGAGGAACCAATCCCAATGGCAACCTATGGATGGAACCTAGTAAAGCTATAC  
TCCGGGAAAGATGTATTCTTTACACCACCTGAGAAATGTGACACCCTCTTGTGTGAT  
ATTGGTGAGTCCTCTCCGAACCCAACTATAGAAGAAGGAAGAACGTTACGTGTTCTA  
AAGATGGTGGAAACCATGGCTCAGAGGAAACCAATTTTGCATAAAAATTCTAAATCC  
CTATATGCCGAGTGTGGTAGAACTTTGGAGCAAATGCAAAGAAAACATGGAGGAA  
TGCTAGTGCGAAATCCACTCTCAAGAACTCCACTCATGAAATGTA CTGGGTTTCAT  
GTGGAACAGGAAACATTGTGTCAGCAGTAAACATGACATCTAGAATGCTGCTAAAT  
CGATTCACAATGGCTCACAGGAAGCCAACATATGAAAGAGACGTGGACTTAGGCGC  
TGGAACAAGACATGTGGCAGTAGAACCAGAGGTGGCCAACCTAGATATCATTGGCC  
AGAGGATAGAGAATATAAAAAATGAACACAAATCAACATGGCATTATGATGAGGAC  
AATCCATACAAACATGGGCCTATCATGGATCATATGAGGTCAAGCCATCAGGATC  
AGCCTCATCCATGGTCAATGGTGTGGTGAGACTGCTAACCAAACCATGGGATGTCAT  
TCCCATGGTCACACAAATAGCCATGACTGACACCACACCCTTTGGACAACAGAGGG

TGTTTAAAGAGAAAGTTGACACGCGTACACCAAAGCGAAACGAGGCACAGCACAA  
ATTATGGAGGTGACAGCCAGGTGGTTATGGGGTTTTCTCTCTAGAAACAAAAACCC  
AGAATCTGCACAAGAGAGGAGTTCACAAGAAAAGTCAGGTCAAACGCAGCTATTGG  
AGCAGTGTTTCGTTGATGAAAATCAATGGAAGTTCAGCAAAAAGAGGCAGTGGAAGATG  
AACGGTTCTGGGACCTTGTGCACGAGAGAGGGAGCTTCATAAACAAGGAAAATGTG  
CCACGTGTGTCTACAACATGATGGGAAAGAGAGAGAAAAAATTAGGAGAGTTCGGA  
AAGGCAAAGGAAGTCGCGCAATATGGTACATGTGGTTGGGAGCGCGCTTTTTAGA  
GTTTGAAGCCCTTGGTTTCATGAATGAAGATCACTGGTTCAGCAGAGAGAATTCCT  
CAGTGGAGTGGAAGGAGAAGGACTCCACAACTTGGATACATACTCAGAGACATAT  
CAAAGATTCCAGGGGGAAATATGTATGCAGATGACACAGCCGGATGGGACACAAGA  
ATAACAGAGGATGATCTTCAGAATGAGGCCAAAATCACTGACATCATGGAACCTGA  
ACATGCCCTATTGGCCACGTCAATCTTTAAGCTAACCTACAAAACAAGGTAGTAAG  
GGTGCAGAGACCAGCGAAAAATGGAACCGTGATGGATGTCATATCCAGACGTGACC  
AGAGAGGAAGTGGACAGGTTGGAACCTATGGCTTAAACACCTTCACCAACATGGAG  
GCCCAACTAATAAGACAAATGGAGTCTGAGGGAATCTTTTACCCAGCGAATTGGA  
AACCCCAAATCTAGCCGAAAGAGTCTCGACTGGTTGAAAAAACATGGCACCGAGA  
GGCTGAAAAGAATGGCAATCAGTGGAGATGACTGTGTGGTGAAACCAATCGATGAC  
AGATTTGCAACAGCCTTAACAGCTTTGAATGACATGGGAAAGGTAAGAAAAGACAT  
ACCGCAATGGGAACCTTCAAAGGATGGAATGATTGGCAACAAGTGCCTTTCTGTTC  
ACACCATTTCCACCAGCTGATTATGAAGGATGGGAGGGAGATAGTGGTGCCATGCC  
GCAACCAAGATGAACTTGTAGGTAGGGCCAGAGTATCACAAGGCGCCGGATGGAGC  
TTGAGAGAACTGCATGCCTAGGCAAGTCATATGCACAAATGTGGCAGCTGATGTA  
CTTCCACAGGAGAGACTTGAGATTAGCGGCTAATGCTATCTGTTCAGCCGTTCCAGT  
TGATTGGGTCCCAACCAGCCGCACCACCTGGTCGATCCATGCCACCATCAATGGAT  
GACAACAGAAGACATGTTGTGAGTGTGGAATAGGGTTTGGATAGAGGAAAACCCAT  
GGATGGAGGACAAGACTCATGTGTCCAGTTGGGAAGACGTTCCATACCTAGGAAAA  
AGGGAAGATCAATGGTGTGGTTCCCTAATAGGCTTAACAGCACGAGCCACCTGGGC  
CACCAACATACAAGTGGCCATAAACCAAGTGAAGGCTCATTGGGAATGAGAATT  
ATCTAGACTTCATGACATCAATGAAGAGATTCAAAAACGAGAGTGATCCCGAAGGG  
GCACTCTGGTAAGCCAACTCATTCAAAAATAAAGGAAAATAAAAAATCAAACAAG  
GCAAGAAGTCAGGCCGGATTAAGCCATAGCACGGTAAGAGCTATGCTGCCTGTGAG  
CCCCGTCCAAGGACGTAAAATGAAGTCAGGCCGAAAGCCACGGTTCGAGCAAGCCG  
TGCTGCCTGTAGCTCCATCGTGGGGATGTAAAAACCCGGGAGGCTGCAAACCATGG  
AAGCTGTACGCATGGGGTAGCAGACTAGTGGTTAGAGGAGACCCCTCCAAGACAC  
AACGCAGCAGCGGGGCCCAACACCAGGGGAAGCTGTACCCTGGTGGTAAGGACTAG  
AGGTTAGAGGAGACCCCCGCACAACAACAACAGCATATTGACGCTGGGAGAGAC  
CAGAGATCCTGCTGTCTCTACAGCATCATTCAGGCACAGAACGCCAAAAAATGGA  
ATGGTGCTGTTGAATCAACAGGTTCT

## Dengue 2

AGTTGTTAGTCTACGTGGACCGACAAAGACAGATTCTTTGAGGGAGCTAAGCTCAAC  
GTAGTTCTAACAGTTTTTTAATTAGAGAGCAGATCTCTGATGAATAACCAACGGAAA  
AAGGCGAAAAACACGCCTTTCAATATGCTGAAACGCGAGAGAAACCGCGTGTGAC  
TGTGCAACAGCTGACAAAGAGATTCTCACTTGGAAATGCTGCAGGGACGAGGACCAT  
TAAACTGTTCATGGCCCTGGTGGCGTTCCTTCGTTTCCTAACAATCCCACCAACAG  
CAGGGATATTGAAGAGATGGGGAACAATTAATAAATCAAAGCTATTAATGTTTTG  
AGAGGGTTCAGGAAAGAGATTGGAAGGATGCTGAACATCTTGAATAGGAGACGCAG  
ATCTGCAGGCATGATCATTATGCTGATTCCAACAGTGATGGCGTTCCATTTAACCAC  
ACGTAACGGAGAACCACACATGATCGTCAGCAGACAAGAGAAAGGGAAAAGTCTTC  
TGTTTTAAACAGAGGATGGCGTGAACATGTGTACCCTCATGGCCATGGACCTTGGTG  
AATTGTGTGAAGACACAATCACGTACAAGTGTCCCCTTCTCAGGCAGAATGAGCCA  
GAAGACATAGACTGTTGGTGAACCTCTACGTCCACGTGGGTAACCTTATGGGACGTGT  
ACCACCATGGGAGAACATAGAAGAGAAAAAAGATCAGTGGCACTCGTTCCACATGT  
GGGAATGGGACTGGAGACACGAACTGAAACATGGATGTCATCAGAAGGGGCCTGG  
AAACATGTCCAGAGAATTGAAACTTGGATCTTGAGACATCCAGGCTTCACCATGATG  
GCAGCAATCCTGGCATAACCCATAGGAACGACACATTTCCAAAGAGCCCTGATTTTC  
ATCTTACTGACAGCTGTCACTCCTTCAATGACAATGCGTTGCATAGGAATGTCAAAT  
AGAGACTTTGTGGAAGGGGTTTCAGGAGGAAGCTGGGTTGACATAGTCTTAGAACA  
TGGAAGCTGTGTGACGACGATGGCAAAAAACAACCAACATTGGATTTTGAAGTGA  
TAAAAACAGAAGCCAAACAGCCTGCCACCCTAAGGAAGTACTGTATAGAGGCAAAG  
CTAACCAACACAACAACAAGAAATCTCGCTGCCAACACAAGGGGAACCCAGCCTAAA  
TGAAGAGCAGGACAAAAGGTTTCGTCTGCAAACTCCATGGTAGACAGAGGATGGG  
GAAATGGATGTGGACTATTTGGAAAGGGAGGCATTGTGACCTGTGCTATGTTGAGAT  
GCAAAAAGAACATGGAAGGAAAAGTTGTGCAACCAGAAAAGTTGGAATACACCATT  
GTGATAACACCTCACTCAGGGGAAGAGCATGCAGTCGGAAATGACACAGGAAAACA  
TGGCAAGGAAATCAAATAACACCACAGAGTTCCATCACAGAAGCAGAATTGACAG  
GTTATGGCACTGTCACAATGGAGTGCTCTCCAAGAACGGGCCTCGACTTCAATGAGA  
TGGTGTGCTGCAGATGGAAAATAAAGCTTGGCTGGTGCACAGGCAATGGTTCCTAG  
ACCTGCCGTTACCATGGTTGCCCGGAGCGGACACACAAGGGTCAAATTGGATACAG  
AAAGAGACATTGGTCACTTTCAAAAATCCCCATGCGAAGAAACAGGATGTTGTTGTT  
TTAGGATCCCAAGAAGGGGCCATGCACACAGCACTTACAGGGGCCACAGAAATCCA  
AATGTCATCAGGAACTTACTCTTACAGGACATCTCAAGTGCAGGCTGAGAATGG  
ACAAGCTACAGCTCAAAGGAATGTCATACTCTATGTGCACAGGAAAGTTTAAAGTT  
GTGAAGGAAATAGCAGAAACACAACATGGAACAATAGTTATCAGAGTGCAATATGA  
AGGGGACGGCTCTCCATGCAAGATCCCTTTTGAGATAATGGATTTGGAAAAAAGAC  
ATGTCTTAGGTGCGCTGATTACAGTCAACCCAATTGTGACAGAAAAGATAGCCCAG  
TCAACATAGAAGCAGAACCTCCATTCGGAGACAGCTACATCATCATAGGAGTAGAG

CCGGGACAACCTGAAGCTCAACTGGTTTAAGAAAGGAAGTTCTATCGGCCAAATGTTT  
GAGACAACAATGAGGGGGGCGAAGAGAATGGCCATTTTAGGTGACACAGCCTGGG  
ATTTTGGATCCTTGGGAGGAGTGTTCACATCTATAGGAAAGGCTCTCCACCAAGTCT  
TTGGAGCAATCTATGGAGCTGCCTTCAGTGGGGTTTCATGGACTATGAAAATCCTCA  
TAGGAGTCATTATCACATGGATAGGAATGAATTCACGCAGCACCTCACTGTCTGTGA  
CACTAGTATTGGTGGGAATTGTGACACTGTATTTGGGAGTCATGGTGCAGGCCGATA  
GTGGTTGCGTTGTGAGCTGGAAAAACAAAGAACTGAAATGTGGCAGTGGGATTTTC  
ATCACAGACAACGTGCACACATGGACAGAACAATACAAGTTCCAACCAGAATCCCC  
TTCAAACCTAGCTTCAGCTATCCAGAAAGCCCATGAAGAGGGCATTGTGGGAATCCG  
CTCAGTAACAAGACTGGAGAATCTGATGTGGAAACAAATAACACCAGAATTGAATC  
ACATTCTATCAGAAAATGAGGTGAAGTAACTATTATGACAGGAGACATCAAAGGA  
ATCATGCAGGCAGGAAAACGATCTCTGCGGCCTCAGCCCCTGAGCTGAAGTATTC  
ATGGAAAACATGGGGCAAAGCAAAAATGCTCTCTACAGAGTCTCATAACCAGACCT  
TTCTCATTGATGGCCCCGAAACAGCAGAATGCCCAACACAAATAGAGCTTGGGAAT  
CGTTGGAAGTTGAAGACTATGGCTTTGGAGTATTCACCACCAATATATGGCTAAAAT  
TGAAAGAAAAACAGGATGTATTCTGCGACTCAAACTCATGTCAGCGGCCATAAAA  
GACAACAGAGCCGTCATGCCGATATGGGTTATTGGATAGAAAGTGCCTCAATGA  
CACATGGAAGATAGAGAAAGCCTCTTTCATTGAAGTTAAAACTGCCACTGGCCAA  
AATCACACACCCTCTGGAGCAATGGAGTGCTAGAAAGTGAGATGATAATTCCAAG  
AATCTCGCTGGACCAGTGTCTCAACACAACCTATAGACCAGGCTACCATACACAAAT  
AACAGGACCATGGCATCTAGGTAAGCTTGAGATGGACTTTGATTTCTGTGATGGAAC  
AACAGTGGTAGTGACTGAGGACTGCGGAAATAGAGGACCCTCTTTGAGAACAACCA  
CTGCCCTCTGGAAAACCTCATAACAGAATGGTGTGCGGATCTTGCACATTACCACCGC  
TAAGATACAGAGGTGAGGATGGGTGCTGGTACGGGATGGAAATCAGACCATTGAAG  
GAGAAAGAAGAGAATTTGGTCAACTCCTTGGTCACAGCTGGACATGGGCAGGTGCA  
CAACTTTTCACTAGGAGTCTTGGGAATGGCATTGTTCTTGGAGGAAATGCTTAGGAC  
CCGAGTAGGAACGAAACATGCAATACTACTAGTTGCAGTTTCTTTTGTGACATTGAT  
CACAGGGAACATGTCCTTTAGAGACCTGGGAAGAGTGATGGTTATGGTAGGCGCCA  
CTATGACGGATGACATAGGTATGGGCGTGACTTATCTTGCCCTACTAGCAGCCTTCA  
AAGTCAGACCAACTTTTGCAGCTGGACTACTCTTGAGAAAGCTGACCTCCAAGGAAT  
TGATGATGACTACTATAGGAATTGTACTCCTCTCCAGAGCACCATAACCAGAGACCA  
TTCTTGAGTTGACTGATGCGTTAGCCTTAGGCATGATGGTCCTCAAATGGTGAGAA  
ATATGGAAAAGTATCAATTGGCAGTGACTATCATGGCTATCTTGTGCGTCCCAAACG  
CAGTGATATTACAAAACGCATGGAAAGTGAGTTGCACAATATTGGCAGTGGTGTCC  
GTTTCCCCACTGCTCTTAACATCCTCACAGCAAAAAACAGATTGGATAACCATTAGCA  
TTGACGATCAAAGGTCTCAATCCAACAGCTATTTTTCTAACAACCCTCTCAAGAACC  
AGCAAGAAAAGGAGCTGGCCATTAAATGAGGCTATCATGGCAGTCGGGATGGTGAG  
CATTTTAGCCAGTTCTCTCCTAAAAAATGATATCCCATGACAGGACCATTAGTGGC  
TGGAGGGCTCCTCACTGTGTGCTACGTGCTCACTGGACGATCGGCCGATTTGGAAC  
GGAGAGAGCAGCCGATGTCAAATGGGAAGACCAGGCAGAGATATCAGGAAGCAGT



CCAATCCTGTCAATAACAATATCAGAAGATGGTAGCATGTTCGATAAAAAATGAAGA  
GGAAGAACAACACTGACCATACTCATTAGAACAGGATTGCTGGTGATCTCAGGAC  
TTTTTCCTGTATCAATACCAATCACGGCAGCAGCATGGTACCTGTGGGAAGTGAAGA  
AACACGGGCCGGAGTATTGTGGGATGTTCCCTTACCCCCACCCATGGGAAAGGCT  
GAACTGGAAGATGGAGCCTATAGAATTAAGCAAAAAGGGATTCTTGGATATTCCA  
GATCGGAGCCGGAGTTTACAAAGAAGGAACATTCATACAATGTGGCATGTACAC  
GTGGCGCTGTTCTAATGCATAAAGGAAAGAGGATTGAACCATCATGGGCGGACGTC  
AAGAAAGACCTAATATCATATGGAGGAGGCTGGAAGTTAGAAGGAGAATGGAAGG  
AAGGAGAAGAAGTCCAGGTATTGGCACTGGAGCCTGGAAAAAATCCAAGAGCCGTC  
CAAACGAAACCTGGTCTTTTCAAACCAACGCCGGAACAATAGGTGCTGTATCTCTG  
GACTTTTCTCCTGGAACGTCAGGATCTCCAATTATCGACAAAAAAGGAAAAGTTGTG  
GGTCTTTATGGTAATGGTGTGTTACAAGGAGTGGAGCATATGTGAGTGCTATAGCC  
CAGACTGAAAAAAGCATTGAAGACAACCCAGAGATCGAAGATGACATTTTCCGAAA  
GAGAAGACTGACCATCATGGACCTCCACCCAGGAGCGGGAAAGACGAAGAGATAC  
CTTCCGGCCATAGTCAGAGAAGCTATAAAACGGGGTTTGAGAACATTAATCTTGGCC  
CCCACTAGAGTTGTGGCAGCTGAAATGGAGGAAGCCCTTAGAGGACTTCCAATAAG  
ATACCAGACCCAGCCATCAGAGCTGAGCACACCCGGGCGGGAGATTGTGGACCTAA  
TGTGTCATGCCACATTTACCATGAGGCTGCTATCACCAGTTAGAGTGCCAACTACA  
ACCTGATTATCATGGACGAAGCCATTTACAGACCCAGCAAGTATAGCAGCTAGA  
GGATACATCTCAACTCGAGTGGAGATGGGTGAGGCAGCTGGGATTTTTATGACAGC  
CACTCCCCCGGGAAGCAGAGACCCATTTCTCAGAGCAATGCACCAATCATAGATG  
AAGAAAGAGAAATCCCTGAACGTTTCGTGGAATTCGGGACATGAATGGGTCACGGAT  
TTTAAAGGGAAGACTGTTTGGTTCGTTCCAAGTATAAAAGCAGGAAATGATATAGC  
AGCTTGCCTGAGGAAAAATGGAAAGAAAGTGATACAACCTCAGTAGGAAGACCTTTG  
ATTCTGAGTATGTCAAGACTAGAACCAATGATTGGGACTTCGTGGTTACAACCTGACA  
TTTCAGAAATGGGTGCCAATTTCAAGGCTGAGAGGGTTATAGACCCAGACGCTGC  
ATGAAACCAGTCATACTAACAGATGGTGAAGAGCGGGTGATTCTGGCAGGACCTAT  
GCCAGTGACCCACTCTAGTGCAGCACAAAGAAGAGGGAGAATAGGAAGAAATCCA  
AAAAATGAGAATGACCAGTACATATACATGGGGGAACCTCTGGAAAATGATGAAGA  
CTGTGCACACTGGAAAGAAGCTAAAATGCTCCTAGATAACATCAACACGCCAGAAG  
GAATCATTCCCTAGCATGTTTCGAACCAGAGCGTGAAAAGGTGGATGCCATTGATGGC  
GAATACCGCTTGAGAGGAGAAGCAAGGAAAACCTTTGTAGACTTAATGAGAAGAGG  
AGACCTACCAGTCTGGTTGGCCTACAGAGTGGCAGCTGAAGGCATCAACTACGCAG  
ACAGAAGGTGGTGTTTTATGATGGAGTCAAGAACAACCAAAATCCTAGAAGAAAACGTG  
GAAGTTGAAATCTGGACAAAAGAAGGGGAAAGGAAGAAATTGAAACCCAGATGGT  
TGGATGCTAGGATCTATTCTGACCCACTGGCGCTAAAAGAATTTAAGGAATTTGCAG  
CCGGAAGAAAGTCTCTGACCCCTGAACCTAATCACAGAAATGGGTAGGCTCCCAACC  
TTCATGACTCAGAAGGCAAGAGACGCACTGGACAACCTTAGCAGTGCTGCACACGGC  
TGAGGCAGGTGGAAGGGCGTACAACCATGCTCTCAGTGAACCTGCCGGAGACCCTGG  
AGACATTGCTTTTACTGACACTTCTGGCTACAGTCACGGGAGGGATCTTTTTATTCTT

GATGAGCGGAAGGGGCATAGGGAAGATGACCCTGGGAATGTGCTGCATAATCACGG  
CTAGCATCCTCCTATGGTACGCACAAATACAGCCACACTGGATAGCAGCTTCAATAA  
TACTGGAGTTTTTTCTCATAGTTTTGCTTATTCCAGAACCTGAAAAACAGAGAACAC  
CCCAAGACAACCAACTGACCTACGTTGTCATAGCCATCCTCACAGTGGTGGCCGCAA  
CCATGGCAAACGAGATGGGTTTCCTAGAAAAACGAAGAAAGATCTCGGATTGGGA  
AGCATTGCAACCCAGCAACCCGAGAGCAACATCCTGGACATAGATCTACGTCCTGC  
ATCAGCATGGACGCTGTATGCCGTGGCCACAACATTTGTTACACCAATGTTGAGACA  
TAGCATTGAAAATTCTCAGTGAATGTGTCCCTAACAGCTATAGCCAACCAAGCCAC  
AGTGTTAATGGGTCTCGGGAAAGGATGGCCATTGTCAAGATGGACATCGGAGTTCC  
CCTTCTCGCCATTGGATGCTACTACAAGTCAACCCATAACTCTCACAGCAGCTCT  
TTTCTTATTGGTAGCACATTATGCCATCATAGGGCCAGGACTCCAAGCAAAGCAAC  
CAGAGAAGCTCAGAAAAGAGCAGCGGGCCGCATCATGAAAAACCAACTGTGCAT  
GGAATAACAGTGATTGACCTAGATCCAATACCTTATGATCCAAAGTTTGAAAAGCA  
GTTGGGACAAGTAATGCTCCTAGTCCTCTGCGTGACTCAAGTATTGATGATGAGGAC  
TACATGGGCTCTGTGTGAGGCTTTAACCTTAGCTACCGGGCCCATCTCCACATTGTG  
GGAAGGAAATCCAGGGAGGTTTTGGAACACTACCATTGCGGTGTCAATGGCTAACA  
TTTTTAGAGGGAGTTACTTGGCCGGAGCTGGACTTCTTTTTCTATTATGAAGAACAC  
AACCAACACAAGAAGGGGAACTGGCAACATAGGAGAGACGCTTGGAGAGAAATGG  
AAAAGCCGATTGAACGCATTGGGAAAAAGTGAATTCCAGATCTACAAGAAAAGTGG  
AATCCAGGAAGTGGATAGAACCCTTAGCAAAGAAGGCATTAAGAAGAGGAGAAACG  
GACCATCACGCTGTGTGCGGAGGCTCAGCAAACTGAGATGGTTCGTTGAGAGAAA  
CATGGTCACACCAGAAGGGAAAGTAGTGGACCTCGGTTGTGGCAGAGGAGGCTGGT  
CATACTATTGTGGAGGACTAAAGAATGTAAGAGAAGTCAAAGGCCTAACAAAAGGA  
GGACCAGGACACGAAGAACCCATCCCCATGTCAACATATGGGTGGAATCTAGTGCG  
TCTTCAAAGTGGAGTTGACGTTTTCTTCATCCCGCCAGAAAAGTGTGACACATTATT  
GTGTGACATAGGGGAGTCATCACCAAATCCCACAGTGGAAAGCAGGACGAACACTCA  
GAGTCCTTAACTTAGTAGAAAATTGGTTGAACAACAACACTCAATTTTGCATAAAGG  
TTCTCAACCCATATATGCCCTCAGTCATAGAAAAAATGGAAGCACTACAAAGGAAA  
TATGGAGGAGCCTTAGTGAGGAATCCACTCTCACGAACTCCACACATGAGATGTA  
CTGGGTATCCAATGCTTCCGGGAACATAGTGTCATCAGTGAACATGATTTCAAGGAT  
GTTGATCAACAGATTTACAATGAGATACAAGAAAGCCACTTACGAGCCGGATGTTG  
ACCTCGGAAGCGGAACCCGTAACATCGGGATTGAAAGTGAGATACCAAACCTAGAT  
ATAATTGGGAAAAGAATAGAAAAAATAAAGCAAGAGCATGAAACATCATGGCACT  
ATGACCAAGACCACCATAAAAACGTGGGCATACCATGGTAGCTATGAAACAAAA  
CAGACTGGATCAGCATCATCCATGGTCAACGGAGTGGTCAGGCTGCTGACAAAACC  
TTGGGACGTCGTCCCCATGGTGACACAGATGGCAATGACAGACACGACTCCATTTGG  
ACAACAGCGCGTTTTTAAAGAGAAAGTGGACACGAGAACCCAAGAACCGAAAGAA  
GGCACGAAGAACTAATGAAAATAACAGCAGAGTGGCTTTGGAAAGAATTAGGGA  
AGAAAAAGACACCAGGATGTGCACCAGAGAAGAATTCACAAGAAAGGTGAGAAG  
CAATGCAGCCTTGGGGGCCATATCACTGATGAGAACAAGTGGAAAGTCGGCACGTG

AGGCTGTTGAAGATAGTAGGTTTTGGGAGCTGGTTGACAAGGAAAGGAATCTCCAT  
CTTGAAGGAAAGTGTGAAACATGTGTGTACAACATGATGGGAAAAAGAGAGAAGA  
AGCTAGGGGAATTCGGCAAGGCAAAAGGCAGCAGAGCCATATGGTACATGTGGCTT  
GGAGCACGCTTCTTAGAGTTTGAAGCCCTAGGATTCTTAAATGAAGATCACTGGTTC  
TCCAGAGAGAACTCCCTGAGTGGAGTGGAAAGGAGAAGGGCTGCACAAGCTAGGTTA  
CATTCTAAGAGACGTGAGCAAGAAAGAGGGAGGAGCAATGTATGCCGATGACACCG  
CAGGATGGGATACAAGAATCACACTAGAAGACCTAAAAAATGAAGAAATGGTAAC  
AAACCACATGGAAGGAGAACACAAGAACTAGCCGAGGCCATTTTCAAACCTAACGT  
ACCAAAACAAGGTGGTGCCTGTGCAAGACCAACACCAAGAGGCACAGTAATGGA  
CATCATATCGAGAAGAGACCAAAAGAGGTAGTGGACAAGTTGGCACCTATGGACTCA  
ATACTTTCACCAATATGGAAGCCCACTAATCAGACAGATGGAGGGAGAAGGAGTC  
TTTAAAAGCATTTCAGCACCTAACAATCACAGAAGAAATCGCTGTGCAAACTGGTT  
AGCAAGAGTGGGGCGCGAAAGGTTATCAAGAATGGCCATCAGTGGAGATGATTGTG  
TTGTGAAACCTTTAGATGACAGGTTTCGCAAGCGCTTTAACAGCTCTAAATGACATGG  
GAAAGATTAGGAAAGACATAACAATGGGAACCTTCAAGAGGATGGAATGATTGG  
ACACAAGTGCCCTTCTGTTTCACACCATTTCCATGAGTTAATCATGAAAGACGGTTCG  
GTACTCGTTGTTCCATGTAGAAACCAAGATGAACTGATTGGCAGAGCCCGAATCTCC  
CAAGGAGCAGGGTGGTCTTTGCGGGAGACGGCCTGTTTGGGGAAGTCTTACGCCCA  
AATGTGGAGCTTGATGTACTTCCACAGACGCGACCTCAGGCTGGCGGCAAATGCTAT  
TTGCTCGGCAGTACCATCACATTGGGTTCCAACAAGTCGAACAACCTGGTCCATACA  
TGCTAAACATGAATGGATGACAACGGAAGACATGCTGACAGTCTGGAACAGGGTGT  
GGATTCAAGAAAACCCATGGATGGAAGACAAAACCTCCAGTGGAAATCATGGGAGGA  
AATCCCATACTTGGGGAAAAGAGAAGACCAATGGTGC GGCTCATTGATTGGGTAA  
CAAGCAGGGCCACCTGGGCAAAGAACATCCAAGCAGCAATAAATCAAGTTAGATCC  
CTTATAGGCAATGAAGAATACACAGATTACATGCCATCCATGAAAAGATTCAGAAG  
AGAAGAGGAAGAAGCAGGAGTTCTGTGGTAGAAAGCAAACTAACATGAAACAAG  
GCTAGAAGTCAGGTCGGATTAAGCCATAGTACGGAAAAAACTATGCTACCTGTGAG  
CCCCGTCCAAGGACGTTAAAAGAAGTCAGGCCATCATAAATGCCATAGCTTGAGTA  
AACTATGCAGCCTGTAGCTCCACCTGAGAAGGTGTAAAAAATCCGGGAGGCCACAA  
ACCATGGAAGCTGTACGCATGGCGTAGTGGACTAGCGGTTAGAGGAGACCCCTCCC  
TTACAAATCGCAGCAACAATGGGGGCCCAAGGCGAGATGAAGCTGTAGTCTCACTG  
GAAGGACTAGAGGTTAGAGGAGACCCCCCGAAACAAAAAACAGCATATTGACGCT  
GGGAAAGACCAGAGATCCTGCTGTCTCCTCAGCATCATTCCAGGCACAGAACGCCA  
GAAAATGGAATGGTGTGTTGAATCAACAGGTTCT

Dengue 3

AGTTGTTAGTCTACGTGGACCGACAAGAACAGTTTCGACTCGGAAGCTTGCTTAACG  
TAGTGCTGACAGTTTTTTATTAGAGAGCAGATCTCTGATGAACAACCAACGGAAGAA  
GACGGGAAAACCGTCTATCAATATGCTGAAACGCGTGAGAAACCGTGTGTCAACTG  
GATCACAGTTGGCGAAGAGATTCTCAAAGGACTGCTGAACGGCCAGGGACCAATG  
AAATTGGTTATGGCGTTCATAGCTTTCCCTCAGATTTCTAGCCATTCCACCAACAGCA  
GGAGTCTTGGCTAGATGGGGAACCTTCAAGAAGTCGGGGGCCATTAAGGTCCTGAA  
AGGCTTCAAGAAGGAGATCTCAAACATGCTGAGCATAATCAACCAACGGAAAAAGA  
CATCGCTCTGTCTCATGATGATATTGCCAGCAGCACTTGCTTTCCACTTGACTTCACG  
AGATGGAGAGCCGCGCATGATTGTGGGAAGAATGAAAGAGGTAAATCCCTACTTT  
TTAAGACAGCCTCTGGAATCAACATGTGCACACTCATAGCCATGGATTTGGGAGAG  
ATGTGTGATGACACGGTCACTTACAAATGCCCCACATTACCGAAGTGGAACCTGAA  
GACATTGACTGCTGGTGCAACCTTACATCAACATGGGTGACTTATGGAACGTGCAAT  
CAAGCTGGAGAGCATAGACGCGACAAGAGATCAGTGGCGTTAGCTCCCCATGTCCG  
CATGGGACTGGACACACGCACCCAAACCTGGATGTCCGGCTGAAGGAGCTTGGAGAC  
AAGTCGAGAAGGTAGAGACATGGGCCCTTAGGCACCCAGGGTTCACCATACTAGCC  
CTATTTCTCGCCCATACATAGGCACTTCCCTGACCCAGAAGGTGGTTATTTTCATAT  
TATTAATGCTGGTCACCCCATCCATGACAATGAGATGTGTGGGAGTAGGAAACAGA  
GATTTTGTGGAAGGGCTATCAGGAGCTACGTGGGTGACGTGGTGCTCGAGCACGG  
GGGGTGTGTGACTACCATGGCTAAGAACAAGCCCACGCTGGATATAGAGCTTCAGA  
AGACCGAGGCCACCCAACTGGCGACCCTAAGGAAGCTATGCATTGAGGGGAAAATT  
ACCAACATAACAACCTGACTCAAGATGTCCTACCCAAGGGGAAGCGGTTTTGCCTGA  
GGAGCAGGACCAGAACTACGTGTGTAAGCATAACATACGTAGACAGAGGTTGGGGGA  
ACGGTTGTGGTTTTGTTTGGCAAAGGAAGCTTGGTAACATGTGCGAAATTTCAATGCC  
TGGAACCAATAGAGGGGAAAAGTGGTGCATATGAGAACCTCAAATACACCGTCATC  
ATTACAGTGCACACAGGAGACCAACACCAGGTGGGAAATGAAACGCAAGGAGTCA  
CGGCTGAGATAACACCTCAGGCATCAACCACTGAAGCCATCTTGCCTGAATATGGA  
ACCCTTGGGCTAGAATGCTCACACGGACAGGTTTGGATTTCAATGAAATGATCTTA  
CTAACAATGAAGAACAAAGCATGGATGGTACATAGACAATGGTTCTTTGACCTACCT  
CTACCATGGGCATCAGGAGCTACAACAGAAACACCAACCTGGAACAGGAAGGAGCT  
TCTTGTGACATTCAAAACGCACATGCGAAAAACAAGAAGTAGTTGTCCTTGGATC  
GCAAGAGGGGAGCAATGCATACCGCACTGACAGGAGCTACAGAAATCCAAAACCTCA  
GGAGGCACAAGCATTTCGCGGGGCACTTAAAATGTAGACTTAAGATGGACAAATT  
GGAACCTCAAGGGGATGAGCTATGCAATGTGCACGAATACCTTTGTGTTGAAGAAAG  
AAGTCTCAGAAACGCAGCACGGGACAATACTCATTAAAGGTTGAGTACAAAGGGGAA  
GATGCACCTTGCAAGATTCCCTTTTCCACAGAGGATGGACAAGGGAAAGCTCATAAT  
GGCAGACTGATCACAGCCAACCTGTGGTGACTAAGAAGGAGGAGCCTGTCAATAT  
TGAGGCTGAACCTCCTTTTGGGGAAAGCAATATAGTAATTGGAATTGGAGACAACG

CCTTGAAAATCAACTGGTACAAGAAGGGGAGCTCGATTGGGAAGATGTTTCGAGGCC  
ACTGAAAGGGGTGCAAGGCGCATGGCCATCTTGGGAGACACAGCTTGGGACTTTGG  
ATCAGTGGGTGGTGTCTGAACTCATTAGGCAAATGGTGCACCAAATATTTGGAAG  
TGCTTATACAGCCCTGTTCAAGTGGAGTCTCTTGGGTGATGAAAATTGGAATAGGTGT  
CCTCTTGACTIONGGATAGGGTTGAATTCAAAAACACATCCATGTCATTTTCATGCATT  
GCGATAGGAATCATTACACTCTATCTGGGAGCTGTGGTACAAGCTGACATGGGGTGT  
GTCATAAACTGGAAGGGCAAAGAACTCAAATGTGGAAGCGGAATTTTCGTCACCAA  
TGAGGTCCATACCTGGACAGAGCAATACAAATCCAAGCAGACTCCCCAAAAGAT  
TGGCAACAGCCATTGCAGGCGCCTGGGAGAATGGAGTGTGTGGAATTAGGTCAACA  
ACCAGAATGGAGAATCTCTTGTGGAAGCAAATAGCCAATGAACTGAACTACATATT  
ATGGGAAAACAATATCAAATTAACGGTAGTTGTGGGCGATACACTTGGGGTCTTAG  
AGCAAGGGAAAAGAACACTAACACCACAACCCATGGAGCTAAAATACTCATGGAA  
AACGTGGGGAAAGGCAAAAATAGTGACAGCTGAAACACAAAATTCCTCTTTCATAA  
TAGACGGGCCAAACACACCGGAGTGTCCAAGTGCCTCAAGAGCATGGAATGTGTGG  
GAGGTGGAAGATTACGGGTTCGGAGTCTTCAACAACCAACATATGGCTGAAACTCCG  
AGAGGTCTACACCCAACACTATGTGACCATAGGCTAATGTCGGCAGCTGTCAAGGATG  
AGAGGGCCGTGCATGCCGACATGGGCTACTGGATAGAAAGCCAAAAGAATGGAAGT  
TGGAAGCTAGAAAAAGCATCCCTCATAGAGGTA AAAACCTGCACATGGCCAAAATC  
ACACACTCTCTGGACTAATGGTGTGCTAGAGAGTGACATGATCATCCCAAAGAGTCT  
AGCTGGTCCTATCTCACAACACA ACTACAGGCCCGGGTACCACACCCAAACGGCAG  
GACCCTGGCACTTAGGAAAATTGGAGCTGGACTTCAACTACTGTGAAGGAACAACA  
GTTGTCATCACAGAAAGCTGTGGGACAAGAGGCCCATCATTGAGAACAACAACAGT  
GTCAGGGAAGTTGATACACGAATGGTGTGCGCTCGTGCACACTTCCCCCCTGCG  
ATACATGGGAGAAGACGGCTGCTGGTATGGCATGGAAATCAGACCCATCAGTGAGA  
AAGAAGAGAACATGGTAAAGTCTTTAGTCTCAGCGGGAAGTGGAAAGGTGGACAAC  
TTCACAATGGGTGTCTTGTGTTTGGCAATCCTCTTTGAAGAGGTGTTGAGAGGAAAA  
TTTGGGAAGAAACACATGATTGCAGGGGTTTTCTTTACGTTTGTGCTCCTTCTCTCAG  
GGCAAATAACATGGAGAGACATGGCGCACACACTAATAATGATCGGGTCCAACGCC  
TCTGACAGGATGGGAATGGGCGTCACCTACCTAGCTCTAATTGCAACATTTAAAATC  
CAGCCATTCTTGGCTTTGGGATTTTTCCTAAGAAAGCTGACATCTAGAGAAAATTTA  
TTGTTAGGAGTTGGGTGGCCATGGCAACAACGTTACA ACTGCCAGAGGACATTGA  
ACAAATGGCAAATGGAGTCGCTCTGGGGCTCATGGCTCTTAAACTGATAACACAATT  
TGAAACATACCAATTGTGGACGGCATTAGTCTCCTTAACGTGTTCAAACACAATTTT  
TACGTTGACTGTTGCCTGGAGAACAGCCACTCTGATTTTGGCCGGAGTTTCGCTTTTA  
CCAGTGTGCCAGTCTTCAAGCATGAGGAAAACAGATTGGCTCCCAATGACAGTGGC  
AGCTATGGGAGTTCACCCCTTCCACTTTTTATTTTTAGCTTGAAAGACACACTCAA  
AGGAGAAGCTGGCCACTGAATGAAGGGGTGATGGCTGTTGGGCTTGTGAGCATTCT  
GGCCAGTTCTCTCCTTAGAAATGATGTGCCATGGCTGGACCATTAGTGGCCGGGGG  
CTTGCTGATAGCGTGCTACGTCATAACTGGCACGTCAGCGGACCTCACTGTAGAAA  
AGCCCCAGATGTAACATGGGAGGAAGAGGCTGAGCAGACAGGAGTGTCCCAACT

TAATGATCACAGTTGATGATGATGGAACAATGAGAATAAAAAGATGATGAGACTGAG  
AACATCCTAACAGTGCTTTTAAAAACAGCATTACTAATAGTATCAGGCATTTTTCCA  
TACTCCATACCCGCAACATTGTTGGTCTGGCACACTTGGCAAAAACAAACCCAAAG  
ATCCGGCGTTTTATGGGACGTACCCAGCCCCCAGAGACACAGAAAGCAGAACTGG  
AAGAAGGGGTTTATAGGATCAAACAGCAAGGAATTTTTGGGAAAACCCAAGTAGGG  
GTTGGAGTACAGAAAGAAGGAGTCTTCCACACCATGTGGCACGTCAAGAGGGGGC  
AGTGTGACACATAATGGGAAAAGACTGGAACCAAACCTGGGCTAGTGTGAAAAAAG  
ATCTGATTCATATGGAGGAGGATGGAGACTGAGCGCACAAATGGCAAAGGGGGAG  
GAGGTGCAGGTTATTGCCGTAGAGCCAGGGGAAGAACCCAAAGAACTTTCAAACCAC  
GCCAGGCACTTTCCAGACTACTACAGGGGAAATAGGAGCAATTGCACTGGATTTCA  
AGCCTGGAACCTCAGGATCTCCTATCATAAATAGAGAGGGAAAGGTAGTGGGACTG  
TATGGCAATGGAGTGGTTACAAAGAATGGTGGCTATGTCAGCGGAATAGCGCAAAC  
AAATGCAGAACCAGATGGACCGACACCAGAGTTGGAAGAAGAGATGTTCAAAAAG  
CGAAACCTGACCATAATGGATCTTCATCCTGGGTCAGGAAAGACACGGAAATACCT  
TCCAGCTATTGTCAGAGAGGCAATCAAGAGACGTTTAAGAACCTTAATTTTGGCACC  
GACAAGGGTGGTTGCAGCTGAGATGGAAGAAGCATTGAAAGGGCTCCCAATAAGGT  
ACCAAACAACAGCAACAAAATCTGAACACACAGGAAGAGAGATTGTTGATCTAATG  
TGCCACGCAACGTTCACAATGCGTTTGCTGTCACCAGTTAGGGTTCCAAATTACAAC  
TTGATAATAATGGATGAGGCCATTTACAGACCCAGCCAGTATAGCGGCTAGAGG  
GTACATATCAACTCGTGTGGAAATGGGAGAGGCAGCCGCAATCTTCATGACAGCAA  
CACCCCCTGGAACAGCTGATGCCTTTCTCAGAGCAACGCTCCAATTCAAGATGAAG  
AAAGGGACATACCAGAACGCTCATGGAATTCAGGCAATGAATGGATTACCGACTTC  
GCTGGGAAAACGGTGTGGTTTGTCCCTAGCATTAAAGCCGGAAATGACATAGCAAA  
CTGCTTGCGAAAAACGGGAAAAAAGTCATTCAACTTAGTAGGAAGACTTTTGACA  
CAGAAATATCAGAAGACTAACTGAATGATTGGGACTTTGTGGTGACAACCTGACATTT  
CAGAAATGGGGGCCAATTTCAAAGCAGATAGAGTGATCGACCCAAGAAGATGTCTC  
AAACCAGTGATCTTGACAGATGGACCAGAGCGGGTGATCCTGGCCGGACCAATGCC  
AGTCACCGCGGCGAGTGCTGCGCAAAGGAGAGGGAGAGTTGGCAGGAACCCACAA  
AAAGAGAATGACCAGTACATATTCACGGGCCAGCCTCTCAACAATGATGAAGACCA  
TGCTCACTGGACAGAAGCAAAAATGCTGCTGGACAACATCAACACACCAGAAGGGA  
TTATACCAGCTCTCTTTGAACCAGAAAGGGAGAAGTCAGCCGCCATAGACGGTGAG  
TATCGCCTGAAGGGTGAGTCCAGGAAGACTTTCGTGGAACCTCATGAGGAGGGGTGA  
CCTTCCAGTTTGGTTAGCCATAAAGTAGCATCAGAAGGAATCAAATACACAGATA  
GAAAATGGTGCTTTGATGGGCAACGCAATAATCAAATTTTAGAGGAGAACATGGAT  
GTGGAAATTTGGACAAAGGAAGGAGAAAAGAAAAAATTGAGACCTAGGTGGCTTG  
ATGCCCCGCACTTATTCAGATCCATTGGCACTCAAGGAATTCAAGGACTTTGCGGCTG  
GCAGAAAGTCAATCGCCCTTGATCTTGTGACAGAAATAGGAAGAGTGCCTTCACATC  
TAGCCACAGAACAAAGAACGCTCTGGACAATCTGGTGATGCTGCATACGTCAGAA  
GATGGCGGTAGGGCTTACAGGCATGCGGTGGAGGAACTACCAGAAACAATGGAAAC  
ACTCTACTCTTGGGACTAATGATCTTGTGACAGGTGGAGCAATGCTTTTCTTGATA

TCAGGTAAAGGGATTGGAAAGACTTCAATAGGACTCATTTGTGTAATCGCTTCCAGC  
GGCATGTTGTGGATGGCCGAAGTCCACTCCAATGGATCGCGTCGGCTATAGTCCTG  
GAGTTTTTTATGATGGTGTGCTCATACCAGAACCAGAAAAGCAGAGAACCCCCAA  
GACAACCAACTCGCATATGTCGTGATAGGCATACTTACATTGGCTGCAACAATAGCA  
GCCAATGAAATGGGACTGCTGGAAACCACAAAGAGAGACTTAGGAATGTCTAAGGA  
GCCAGGTGTTGTTTCTCCAACCAGCTATTTGGATGTGGACTTGCACCCAGCATCAGC  
CTGGACATTGTACGCCGTGGCCACTACAGTAATAACACCAATGTTAAGACATACCAT  
AGAGAATTCTACAGCAAATGTGTCCCTGGCAGCTATAGCCAACCAGGCAGTGGTCCT  
GATGGGTTTGGACAAAGGATGGCCAATATCAAAAATGGACTTAGGCGTGGCACTAC  
TGGCACTGGGTTGCTATTCACAAGTGAACCCACTGACTCTAACTGCGGCAGTACTTT  
TGCTAATCACACATTATGCTATCATAGGTCCAGGATTGCAAGCAAAGCCACCCGTG  
AAGCTCAGAAAAGGACAGCTGCTGGAATAATGAAGAATCCAACAGTGGATGGGATA  
ATGACAATAGACCTAGATTCTGTAATATTTGATTCAAAAATTTGAAAAACAACTGGGA  
CAGGTTATGCTCCTGGTTTTGTGCGCAGTCCAACCTTTGCTAATGAGAACATCATGG  
GCCTTGTGTGAAGCTTTAACTCTAGCTACAGGACCAATAACAACACTCTGGGAAGGA  
TCACCTGGTAAGTTCTGGAACACCACGATAGCTGTTTCCATGGCGAACATTTTTTAGA  
GGGAGCTATTTAGCAGGAGCTGGGCTTGGCTTTTTCTATTATGAAATCAGTTGGAACA  
GGAAAAAGAGGAACAGGCTCACAAGGTGAACTTTAGGAGAAAAATGGAAAAAGA  
AATTAATCAATTATCCCGGAAAGAGTTTGACCTTTACAAGAAATCTGGAATCACTG  
AAGTGGATAGAACAGAAGCCAAAGAAGGGTTGAAAAGAGGAGAGACAACACATCA  
TGCCGTGTCCCGAGGTAGCGCAAACTTCAATGGTTTTGTGGAAAGAAACATGGTCGT  
TCCCGAAGGAAGAGTCATAGACTTGGGCTGTGGAAGAGGAGGCTGGTCATATTACT  
GTGCAGGACTGAAAAAGTACAGAAAGTGCAGGATACACAAAAGGCGGTCCAGG  
ACACGAAGAACCAGTACCTATGTCTACATATGGATGGAACATAGTTAAGTTAATGA  
GCGGAAAGGATGTGTTCTATCTCCACCTGAAAAGTGTGATACCCTGTTGTGTGACA  
TTGGAGAATCTTCACCAAGCCCAACAGTGGAAAGAGAGCAGAACTATAAGAGTTTTG  
AAGATGGTTGAACCATGGCTAAAAACAACCAGTTTTGCATTAAGTTTTGAACCCT  
TACATGCCAACTGTGATTGAGCACCTAGAAAGACTACAAAGGAAACATGGAGGAAT  
GCTTGTGAGAAATCCACTTTCACGAACTCCACGCACGAAATGTACTGGATATCTAA  
TGGCACAGGTAACATTGTCTCTCAGTCAACATGGTGTCTAGATTGCTACTGAACAG  
GTTACGATGACACACAGGAGACCCACCATAGAGAAAGATGTGGATTTAGGAGCAG  
GAACTCGACATGTTAATGCGGAACCAGAAACACCCAACATGGATGTCATTGGGGAA  
AGAATAAAAAGGATCAAGGAGGAGCATAATTCAACATGGCACTATGATGACGAAA  
ACCCCTACAAAACGTGGGCTTACCATGGATCCTATGAAGTCAAAGCCACAGGCTCA  
GCCTCCTCCATGATAAATGGAGTCGTGAAACTCCTCACCAAACCATGGGATGTGGTG  
CCCATGGTGACACAGATGGCAATGACAGACACAACCTCCATTTGGCCAGCAGAGAGT  
CTTTAAAGAGAAAGTGGACACCAGGACGCCAGGCCATGCCAGGGACAAGAAAG  
GCTATGGAGATCACAGCGGAGTGGCTCTGGAGAACCCTGGGAAGGAACAAAAGACC  
CAGATTATGCACAAGGGAAGAGTTTACAAAAAAGGTCAGAACTAACGCAGCCATGG  
GCGCCGTTTTACAGAGGAGAACCAATGGGACAGTGCAGAAAGCTGCTGTTGAGGAT

GAAGAATTTTGGAACTTGTGGACAGAGAACGTGAACTCCACAAATTGGGCAAATG  
TGGAAGCTGCGTTTATAACATGATGGGCAAGAGAGAGAAAAACTTGGAGAGTTTG  
GCAAAGCAAAGGCAGTAGAGCTATATGGTACATGTGGTTGGGAGCCAGGTACCTT  
GAGTTCGAAGCCCTTGGATTCTTAAATGAAGACCACTGGTTCTCGCGTGAAAACCTCT  
TACAGTGGAGTAGAAGGAGAAGGACTGCACAAGCTAGGCTACATATTAAGGGACAT  
TTCCAAGATACCCGGAGGAGCCATGTATGCTGATGACACAGCTGGTTGGGACACAA  
GAATAACAGAAGATGACCTGCACAATGAGGAAAAGATCATAACAGCAAATGGACCCT  
GAACACAGGCAGTTAGCGAACGCTATATTCAAGCTCACATAACAAAACAAAGTGGT  
CAAAGTTCAACGACCGACTCCAACGGGCACGGTAATGGATATTATATCTAGGAAAG  
ACCAAAGGGGCAGTGGACAACCTGGGAACTTATGGCCTGAATACATTCACCAACATG  
GAAGCCCAGTTAGTCAGACAAATGGAAGGAGAAGGTGTGCTGACAAAGGCAGACCT  
CGAGAACCCTCATCTGCTAGAGAAGAAAATCACACAATGGTTGGAAACCAAAGGAG  
TGGAGAGGTTAAAAAGAATGGCCATTAGCGGGGATGATTGCGTGGTGAAACCAATC  
GATGACAGGTTTCGCTAATGCCCTGCTTGCTTTGAACGATATGGGAAAGGTTTCGGAAA  
GACATACCTCAATGGCAGCCATCAAAGGGATGGCATGATTGGCAACAGGTTCCCTTC  
TGCTCCCACCACTTTCATGAATTGATCATGAAAGATGGAAGAAAGTTGGTGGTTCCC  
TGCAGACCCCAGGACGAACTAATAGGAAGAGCAAGAATCTCTCAAGGAGCGGGATG  
GAGCCTTAGAGAAACTGCATGTCTGGGGAAAGCCTACGCCCAAATGTGGAGTCTCA  
TGTATTTTCACAGAAGAGATCTCAGATTAGCATCCAACGCCATATGTTTCAGCAGTAC  
CAGTCCACTGGGTTCCCAAGTAGAACGACATGGTCTATTCATGCTCACCATCAGT  
GGATGACTACAGAAGACATGCTTACTGTTTGGAAACAGGGTGTGGATAGAGGAAAAT  
CCATGGATGGAAGACAAAACCTCCAGTTACAACCTTGGGAAAATGTTCCATATCTAGG  
AAAGAGAGAAGACCAATGGTGTGGATCACTTATTGGTCTCACTTCCAGAGCAACCT  
GGGCCCAGAACATACCCACAGCAATTCAACAGGTGAGAAGCCTTATAGGCAATGAA  
GAGTTCCTGGACTACATGCCTTCAATGAAGAGATTCAGGAAGGAAGAGGAGTCGGA  
GGGAGCCATTTGGTAAACGTAGGAAGTGGAAAAGAGGCTAACTGTCAGGCCACCTT  
AAGCCACAGTACGGAAGAAGCTGTGCTGCCTGTGAGCCCCGTCCAAGGACGTTAAA  
AGAAGAAGTCAGGCCCAAAGCCACGGTTTGGAGCAAACCGTGCTGCCTGTAGCTCC  
GTCGTGGGGACGTAAAACCTGGGAGGCTGCAAACCTGTGGAAGCTGTACGCACGGTG  
TAGCAGACTAGCGGTTAGAGGAGACCCCTCCCATGACACAACGCAGCAGCGGGGCC  
CGAGCACTGAGGGAAGCTGTACCTCCTTGCAAAGGACTAGAGGTTAGAGGAGACCC  
CCCGCAAATAAAAACAGCATATTGACGCTGGGAGAGACCAGAGATCCTGCTGTCTC  
CTCAGCATCATTCCAGGCACAGAACGCCAGAAAATGGAATGGTGTGCTGTTGAATCAA  
CAGGTTCT



Dengue 4

AGTTGTTAGTCTGTGTGGACCGACAAGGACAGTTCCAAATCGGAAGCTTGCTTAACA  
CAGTTCTAACAGTTTGTGTTGAATAGAGAGCAGATCTCTGGAAAAATGAACCAACGA  
AAAAAGGTGGTTAGACCACCTTTCAATATGCTGAAACGCGAGAGAAACCGCGTATC  
AACCCCTCAAGGGTTGGTGAAGAGATTCTCAACCGGACTTTTTTCTGGGAAAGGACC  
CTTACGGATGGTGCTAGCATTCATCACGTTTTTGCAGATCCTTTCCATCCCACCAACA  
GCAGGGATTCTGAAGAGATGGGGACAGTTGAAGAAAAATAAGGCCATCAAGATACT  
GATTGGATTCAGGAAGGAGATAGGCCGCATGCTGAACATCTTGAACGGGAGAAAAA  
GGTCAACGATAACATTGCTGTGCTTGATTCCCACCGTAATGGCGTTTTCCCTCAGCA  
CAAGAGATGGCGAACCCCTCATGATAGTGGCAAACATGAAAGGGGGAGACCTCTC  
TTGTTTAAGACAACAGAGGGGATCAACAAATGCACTCTCATTGCCATGGACTTGGGT  
GAAATGTGTGAGGACACTGTCACGTATAAATGCCCCCTACTGGTCAATACCGAACCT  
GAAGACATTGATTGCTGGTGAACCTCACGTCTACCTGGGTCATGTATGGGACATGC  
ACCCAGAGCGGAGAACGGAGACGAGAGAAGCGCTCAGTAGCTTTAACACCACATTC  
AGGAATGGGATTGGAAACAAGAGCTGAGACATGGATGTCATCGGAAGGGGCTTGGGA  
AGCATGCTCAGAGAGTAGAGAGCTGGATACTCAGAAACCCAGGATTCGCGCTCTTG  
GCAGGATTTATGGCTTATATGATTGGGCAAACAGGAATCCAGCGAACTGTCTTCTTT  
GTCCTAATGATGCTGGTCGCCCCATCCTACGGAATGCGATGCGTAGGAGTAGGAAA  
CAGAGACTTTGTGGAAGGAGTCTCAGGTGGAGCATGGGTCGACCTGGTGCTAGAAC  
ATGGAGGATGCGTCACAACCATGGCCCAGGGAAAACCAACCTTGGATTTTGAACCTG  
ACTAAGACAACAGCCAAGGAAGTGGCTCTGTTAAGAACCTATTGCATTGAAGCCTC  
AATATCAAACATAACTACGGCAACAAGATGTCCAACGCAAGGAGAGCCTTATCTGA  
AAGAGGAACAGGACCAACAGTACATTTGCCGGAGAGATGTGGTAGACAGAGGGTG  
GGGCAATGGCTGTGGCTTGTTTGGAAAAGGAGGAGTTGTGACATGTGCGAAGTTTTTC  
ATGTTCCGGGAAGATAACAGGCAATTTGGTCCAAATTGAGAACCTTGAATACACAG  
TGGTTGTAACAGTCCACAATGGAGACACCCATGCAGTAGGAAATGACACATCCAAT  
CATGGAGTTACAGCCATGATAACTCCCAGGTCACCATCGGTGGAAGTCAAATTGCCG  
GACTATGGGAGAACTAACACTCGATTGTGAACCCAGGTCTGGAATTGACTTTAATGAG  
ATGATTCTGATGAAAATGAAAAAGAAAACATGGCTCGTGCATAAGCAATGGTTTTT  
GGATCTGCCTCTTCCATGGACAGCAGGAGCAGACACATCAGAGGTTCACTGGAATT  
ACAAAGAGAGAATGGTGACATTTAAGGTTCCCTCATGCCAAGAGACAGGATGTGACA  
GTGCTGGGATCTCAGGAAGGAGCCATGCATTCTGCCCTCGCTGGAGCCACAGAAGT  
GGACTCCGGTGATGGAAATCACATGTTTGCAGGACATCTTAAGTGCAAAGTCCGTAT  
GGAGAAATTGAGAATCAAGGGAATGTCATACACGATGTGTTTCAAGGAAAGTTTTCAA  
TTGACAAAGAGATGGCAGAAACACAGCATGGGACAACAGTGGTGAAGTCAAGTAT  
GAAGGTGCTGGAGCTCCGTGTAAAGTCCCCATAGAGATAAGAGATGTAAACAAGGA  
AAAAGTGGTTGGGCGTATCATCTCATCCACCCCTTTGGCTGAGAATACCAACAGTGT  
AACCAACATAGAATTAGAACCCCCCTTTGGGGACAGCTACATAGTGATAGGTGTTG

GAAACAGCGCATTAACTCCATTGGTTCAGGAAAGGGAGTTCATTGGCAAGATG  
TTTGAGTCCACATACAGAGGTGCAAAACGAATGGCCATTCTAGGTGAAACAGCTTG  
GGATTTTGGTTCGGTTGGTGGACTGTTACATCATTGGGAAAGGCTGTGCACCAGGT  
TTTTGGAAGTGTGTATAACAACCATGTTTGGAGGAGTCTCATGGATGATTAGAATCCT  
AATTGGGTTCTTAGTGTGTGGATTGGCACGAACTCGAGGAACACTTCAATGGCTAT  
GACGTGCATAGCTGTTGGAGGAATCACTCTGTTTCTGGGCTTCACAGTTCAAGCAGA  
CATGGGTGTGTGGCGTCATGGAGTGGGAAAGAATTGAAGTGTGGAAGCGGAATTT  
TTGTGGTTGACAACGTGCACACTTGGACAGAACAGTACAAATTTCAACCAGAGTCCC  
CAGCGAGACTAGCGTCTGCAATATTAATGCCCACAAAGATGGGGTCTGTGGAATT  
AGATCAACCACGAGGCTGGAAAATGTCATGTGGAAGCAAATAACCAACGAGCTAAA  
CTATGTTCTCTGGGAAGGAGGACATGACCTCACTGTAGTGGCTGGGGATGTGAAGG  
GGGTGTTGACCAAAGGCAAGAGAGCACTCACACCCCCAGTGAGTGATCTGAAATAT  
TCATGGAAGACATGGGGAAAAGCAAAAATCTTCACCCCAGAAGCAAGAAATAGCAC  
ATTTTAAATAGACGGACCAGACACCTCTGAATGCCCAATGAACGAAGAGCATGGA  
ACTCTCTTGAGGTGGAAGACTATGGATTTGGCATGTTACGACCAACATATGGATGA  
AATCCGAGAAGGAAGTTCAGAAGTGTGTGACCACAGGTTAATGTCAGCTGCAATT  
AAAGATCAGAAAGCTGTGCATGCTGACATGGGTTATTGGATAGAGAGCTCAAAAA  
CCAGACCTGGCAGATAGAGAAAGCATCTCTTATTGAAGTGAAAACATGTCTGTGGC  
CCAAGACCCACACACTGTGGAGCAATGGAGTGCTGGAAAGCCAGATGCTCATTCCA  
AAATCATATGCGGGCCCTTTTTACAGCACAATTACCGCCAGGGCTATGCCACGCAA  
ACCGTGGGCCCATGGCACTTAGGCAAATTAGAGATAGACTTTGGAGAATGCCCCGG  
ACAACAGTCACAATTCAGGAGGATTGTGACCATAGAGGCCATCTTTGAGGACCA  
CCACTGCATCTGGAAAAGTACGCAATGGTGCTGCCGCTCCTGCACGATGCCTC  
CCTTAAGGTTCTTGGGAGAAGATGGGTGCTGGTATGGGATGGAGATTAGGCCCTTGA  
GTGAAAAGAAGAGAACATGGTCAAATCACAGGTGACGGCCGGACAGGGCACATC  
AGAACTTTTTCTATGGGTCTGTTGTGCCTGACCTTGTGTTGTGGAAGAATGCTTGAGG  
AGAAGAGTCACTAGGAAACACATGATATTAGTTGTGGTGATCACTCTTTGTGCTATC  
ATCCTGGGAGGCCTCACATGGATGGACTTACTACGAGCCCTCATCATGTTGGGGGAC  
ACTATGTCTGGTAGAATAGGAGGACAGATCCACCTAGCCATCATGGCAGTGTTCAA  
GATGTCACCAGGATACGTGCTGGGTGTGTTTTAAGGAACTCACTTCAAGAGAGAC  
AGCACTAATGGTAATAGGAATGGCCATGACAACGGTGCTTTCAATTCCACATGACCT  
TATGGAACCTATTGATGGAATATCACTGGGACTAATTTTGCTAAAAATAGTAACACA  
GTTTGACAACACCCAAGTGGGAACCTTAGCTCTTTCCTTGACTTTCATAAGATCAAC  
AATGCCATTGGTCATGGCTTGGAGGACCATTATGGCTGTGTTGTTGTGGTCACT  
CATTCTTTGTGCAGGACAAGCTGTCTTCAAAAACAGTCTCATTGGGTAGAAATAAC  
AGCACTCATCCTAGGAGCCCAAGCTCTGCCAGTGTACCTAATGACTCTTATGAAAGG  
AGCCTCAAGAAGATCTTGGCCTCTTAACGAGGGCATAATGGCTGTGGGTTTGGTTAG  
TCTCTTAGGAAGCGCTCTTTTAAAGAATGATGTCCCTTTAGCTGGCCCAATGGTGGC  
AGGAGGCTTACTTCTGGCGGCTTACGTGATGAGTGGTAGCTCAGCAGATCTGTCACT  
AGAGAAGGCCCAACGTGCAGTGGGATGAAATGGCAGACATAACAGGCTCAAGC

CCAATCGTAGAAGTGAAGCAGGATGAAGATGGCTCTTTCTCCATACGGGACGTCGA  
GGAAACCAATATGATAACCCTTTTGGTGAAACTGGCACTGATAACAGTGTGAGGTCT  
CTACCCCTTGGCAATTCAGTCACAATGACCTTATGGTACATGTGGCAAGTGAAAAC  
ACAAAGATCAGGAGCCCTGTGGGACGTCCCCTCACCCGCTGCCACTAAAAAAGCCG  
CACTGTCTGAAGGAGTGTACAGGATCATGCAAAGAGGGTTATTTCGGGAAAACACTCAG  
GTTGGAGTAGGGATACACATGGAAGGTGTATTTACACAATGTGGCATGTAACAAG  
AGGATCAGTGATCTGCCACGAGACTGGGAGATTGGAGCCATCTTGGGCTGACGTCA  
GGAATGACATGATATCATAACGGTGGGGGATGGAGGCTTGGAGACAAATGGGACAAA  
GAAGAAGACGTTACGGTCTCGCCATAGAACCAGGAAAAAATCCTAAACATGTCCA  
AACGAAACCTGGCCTTTTCAAGACCCTAACTGGAGAAATTGGAGCAGTAACATTAG  
ATTTCAAACCCGGAACGTCTGGTTCTCCCATCATCAACAGGAAAGGAAAAGTCATCG  
GACTCTATGGAAATGGAGTAGTTACCAAATCAGGTGATTACGTACAGTCCATAACGC  
AAGCCGAAAGAATTGGAGAGCCAGATTATGAAGTGGATGAGGACATTTTTTCGAAAG  
AAAAGATTAACATAATGGACTTACACCCCGGAGCTGGAAAGACAAAAGAATTCT  
TCCATCAATAGTGAGAGAAGCCTTAAAAAGGAGGCTACGAACTTTGATTTTAGCTCC  
CACGAGAGTGGTGGCGGCCGAGATGGAAGAGGCCCTACGTGGACTGCCAATCCGTT  
ATCAGACCCAGCTGTGAAATCAGAACACACAGGAAGAGAGATTGTAGACCTCATG  
TGTCATGCAACCTTCACAACAAGACTTTTGTTCATCAACCAGGGTTCCAAATTACAAC  
CTTATAGTGATGGATGAAGCACATTTACCCGATCCTTCTAGTGTGCGGGCTAGAGGA  
TACATCTCGACCAGGGTGGAAATGGGAGAGGCAGCAGCCATCTTCATGACCGCAAC  
CCCTCCCGGAGCGACAGATCCCTTTCCCCAGAGCAACAGCCCAATAGAAGACATCG  
AGAGGGAAATTCGGAAAGGTCATGGAACACAGGGTTCGACTGGATAACAGACTAC  
CAAGGGAAAACACTGTGTGGTTTGTTCACAGCATAAAAGCTGGAAATGACATTGCAAA  
TTGTTTGAGAAAGTCGGGAAAGAAAGTTATCCAGTTGAGTAGGAAAACCTTTGATA  
CAGAGTATCCAAAACGAAACTCACGGACTGGGACTTTGTGGTCACTACAGACATA  
TCTGAAATGGGGGCCAATTTTAGAGCCGGGAGAGTGATAGACCCTAGAAGATGCCT  
CAAGCCAGTTATCCTACCAGATGGGCCAGAGAGAGTCATTTTAGCAGGTCTTATCC  
AGTGACTCCAGCAAGCGCTGCTCAGAGAAGAGGGCGAATAGGAAGGAACCCAGCA  
CAAGAAGACGACCAATACGTTTTCTCCGGAGACCCACTAAAAAATGATGAAGATCA  
TGCCCACTGGACAGAAGCAAAGATGCTGCTTGACAATATCTACACCCAGAAAGGA  
TCATTCCAACATTGTTTGGTCCGGAAAGGGAAAAAACC CAAGCCATTGATGGAGAG  
TTTCGCCTCAGAGGGGAACAAAGGAAGACTTTTGTGGAATTAATGAGGAGAGGAGA  
CCTTCCGGTGTGGCTGAGCTATAAGGTAGCTTCTGCTGGCATTCTTACGAAGATCG  
GGAATGGTGTTCACAGGGGAAAGAAATAACCAAATTTTAGAAGAAAACATGGAGG  
TTGAAATTTGGACTAGAGAGGGAGAAAAGAAAAGCTAAGGCCAAGATGGTTAGAT  
GCACGTGTATACGCTGACCCCATGGCTTTGAAGGATTTCAAGGAGTTTGCCAGTGGA  
AGGAAGAGTATAACTCTCGACATCTAACAGAGATTGCCAGTTTGCCAACTTACCTT  
TCCTCTAGGGCCAAGCTCGCCCTTGATAACATAGTCATGCTCCACACAACAGAAAGA  
GGAGGGAGGGCCTATCAACACGCCCTGAACGAACTTCCGGAGTCACTGGAAACACT  
CATGCTTGTAGCTTTACTAGGTGCTATGACAGCAGGCATCTTCCTGTTTTTCATGCAA

GGGAAAGGAATAGGGAAATTGTCAATGGGTTTGATAACCATTTGCGGTGGCTAGTGG  
CTTGCTCTGGGTAGCAGAAATTCAACCCCAGTGGATAGCGGCCTCAATCATACTAGA  
GTTTTTCTCATGGTACTGTTGATACCGGAACCAGAAAAACAAAGGACCCCAACAAGA  
CAATCAATTGATCTACGTCATATTGACCATTCTCACCATCATTGGTCTAATAGCAGCC  
AACGAGATGGGGCTGATTGAAAAACAAAAACGGATTTTGGGTTTTACCAGGTAAA  
AACAGAAACCACCATCCTCGATGTGGACTTGAGACCAGCTTCAGCATGGACGCTCT  
ATGCAGTAGCCACCACAATTCTGACTCCCATGCTGAGACACACCATAGAAAACACG  
TCGGCCAACCTATCTCTAGCAGCCATTGCCAACAGGCAGCCGTCCTAATGGGGCTT  
GGAAAAGGATGGCCGCTCCACAGAATGGACCTCGGTGTGCCGCTGTTAGCAATGGG  
ATGCTATTCTCAAGTGAACCCAACAACCTTGACAGCATCCTTAGTCATGCTTTTAGTC  
CATTATGCAATAATAGGCCCAGGATTGCAGGCAAAAGCCACAAGAGAGGCCAGAA  
AAGGACAGCTGCTGGGATCATGAAAAATCCCACAGTGGACGGGATAACAGTAATAG  
ATCTAGAACCAATATCCTATGACCCAAAATTTGAAAAGCAATTAGGGCAGGTCATG  
CTACTAGTCTTGTGTGCTGGACAACACTCTTGATGAGAACAACATGGGCTTTCTGT  
GAAGTCTTGACTTTGGCCACAGGACCAATCTTGACCTTGTGGGAGGGCAACCCGGG  
AAGTTTTGGAACACGACCATAGCCGTATCCACCGCCAACATTTTCAGGGGAAGTTA  
CTTGCGGGGAGCTGGACTGGCTTTTTCACTCATAAAGAATGCACAAACCCCTAGGAG  
GGGAACCTGGGACCACAGGAGAGACTGGGAGAGAAGTGGAAGAGACAGCTAAAC  
TCATTAGACAGAAAAGAGTTTGAAGAGTATAAAAGAAGTGAATACTAGAAAGTGA  
CAGGACTGAAGCCAAGTCTGCCCTGAAAGATGGGTCTAAAATCAAGCATGCAGTAT  
CAAGAGGGTCCAGTAAGATCAGATGGATTGTTGAGAGAGGGATGGTAAAGCCAAAA  
GGGAAAGTTGTAGATCTTGGCTGTGGGAGAGGAGGATGGTCTTATTACATGGCGAC  
ACTCAAGAACGTGACTGAAGTGAAGGGTATACAAAAGGAGGTCCAGGACATGAA  
GAACCGATTCCCATGGCTACTTATGGTTGGAATTTGGTCAAACCTCCATTCAGGGGTT  
GACGTGTTCTACAAACCCACAGAGCAAGTGGACACCCTGCTCTGTGATATTGGGGA  
GTCATCTTCTAATCCAACAATAGAGGAAGGAAGAACATTAAGAGTTTTGAAGATGG  
TGGAGCCATGGCTCTCTTCAAACCTGAATTCTGCATCAAAGTCCTTAACCCCTACA  
TGCCAACAGTCATAGAAGAGCTGGAGAACTGCAGAGAAAACATGGTGGGAACCTT  
GTCAGATGCCCGCTGTCCAGGAACCTCACCCATGAGATGTATTGGGTGTCAGGAGCG  
TCGGGAAACATTGTGAGCTCTGTGAACACAACATCAAAGATGTTGTTGAACAGGTTT  
ACAACAAGGCATAGGAAACCCACTTATGAGAAGGACGTAGATCTTGGGGCAGGAAC  
GAGAAGTGTCTCCACTGAAACAGAAAAACCAGACATGACAATCATTGGGAGAAGGC  
TTCAGCGATTGCAAGAAGAGCACAAAGAAACCTGGCATTATGATCAGGAAAACCCA  
TACAGAACCTGGGCGTATCATGGAAGCTATGAAGCTCCTTCGACAGGCTCTGCATCC  
TCCATGGTGAACGGGGTGGTAAACTGCTAACAAAACCTGGGATGTGATTCCAAT  
GGTGACTCAGTTAGCCATGACAGATACAACCCCTTTTGGGCAACAAAGAGTGTTCAA  
AGAGAAGGTGGATAACCAGAACACCACAACCAAAAACCCGGTACACGAATGGTTATGA  
CCACGACAGCCAATTGGCTGTGGGCCCTCCTTGGAAGAAGAAAAATCCCAGACTG  
TGCACAAGGGAAGAGTTCATCTCAAAGTTAGATCAAACGCAGCCATAGGCGCAGT  
CTTTCAGGAAGAACAGGGATGGACATCAGCCAGTGAAGCTGTGAATGACAGCCGGT

TTTGGGAACTGGTTGACAAAGAAAGGGCCCTACACCAGGAAGGGAAATGTGAATCG  
TGTGTCTATAACATGATGGGAAAACGTGAGAAAAAGTTAGGAGAGTTTGGCAGAGC  
CAAGGGAAGCCGAGCAATCTGGTACATGTGGCTGGGAGCGCGGTTTCTGGAATTTG  
AAGCCCTGGGTTTTTTGAATGAAGATCACTGGTTTGGCAGAGAAAATTCATGGAGTG  
GAGTGGAAGGGGAAGGTCTGCACAGATTGGGATATATCCTGGAGGAGATAGACAAG  
AAGGATGGAGACCTAATGTATGCTGATGACACAGCAGGCTGGGACACAAGAATCAC  
TGAGGATGACCTTCAAAATGAGGAACTGATCACGGAACAGATGGCTCCCCACCACA  
AGATCCTAGCCAAAGCCATTTTCAAACCTATCAAAACAAAGTGGTGAAAGTC  
CTCAGACCCACACCCGCGGGGAGCGGTGATGGATATCATATCCAGGAAAGACCAAAG  
AGGTAGTGGACAAGTTGGAACATATGGTTTGAACACATTCACCAACATGGAAGTTC  
AACTCATCCGCCAAATGGAAGCTGAAGGAGTCATCACACAAGATGACATGCAGAAC  
CCAAAAGGGTTGAAAGAAAGAGTTGAGAAAATGGCTGAAAGAGTGTGGTGTGCGACA  
GGTTAAAGAGGATGGCAATCAGTGGAGACGATTGCGTGGTGAAGCCCCTAGATGAG  
AGGTTTGGCACTTCCCTCCTCTTCTTGAACGACATGGGAAAGGTGAGGAAAGACATT  
CCGCAGTGGGAACCATCTAAGGGATGGAAAACTGGCAAGAGGTTCTTTTTGCTCC  
CACCCTTTCACAAGATCTTTATGAAGGATGGCCGCTCACTAGTTGTTCCATGTAGA  
AACCAGGATGAACTGATAGGGAGAGCCAGAATCTCGCAGGGAGCTGGATGGAGCTT  
AAGAGAAACAGCCTGCCTGGGCAAAGCTTACGCCCAGATGTGGTGCCTTATGTACTT  
CCACAGAAGGGATCTGCGTTTAGCCTCCATGGCCATATGCTCAGCAGTTCCAACGGA  
ATGGTTTCCAACAAGCAGAACAACATGGTCAATCCACGCTCATCACCAGTGGATGA  
CCACTGAAGATATGCTCAAAGTGTGGAACAGAGTGTGGATAGAAGACAACCCTAAT  
ATGACTGACAAGACTCCAGTCCATTCGTGGGAAGATATACCTTACCTAGGGAAAAG  
AGAGGATTTGTGGTGTGGATCCCTGATTGGACTTTCTTCCAGAGCCACCTGGGCGAA  
GAACATTCATACGGCCATAACCCAGGTCAGGAACCTGATCGGAAAAGAGGAATACG  
TGGATTACATGCCAGTAATGAAAAGATACAGTGCTCCTTCAGAGAGTGAAGGAGTT  
CTGTAATTACCAACAACAACACCAAAGGCTATTGAAGTCAGGCCACTTGTGCCAC  
GGTTTGGAGCAAACCGTGCTGCCTGTAGCTCCGCCAATAATGGGAGGCGTAATAATCC  
CCAGGGAGGCCATGCGCCACGGAAGCTGTACGCGTGGCATAATTGGACTAGCGGTTA  
GAGGAGACCCCTCCCATCACTGATAAAACGCAGCAAAAGGGGGCCCGAAGCCAGG  
AGGAAGCTGTACTCCTGGTGGAAAGGACTAGAGGTTAGAGGAGACCCCCCAACACA  
AAAACAGCATATTGACGCTGGGAAAGACCAGAGATCCTGCTGTCTCTGCAACATCA  
ATCCAGGCACAGAGCGCCGCAAGATGGATTGGTGTGTTGATCCAACAGGTTCT

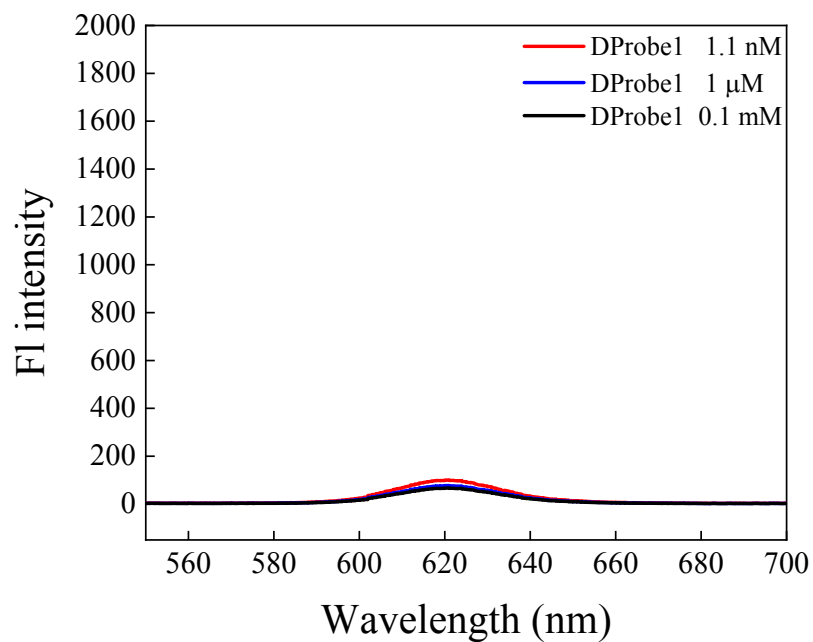

**Fig S1.** Initial fluorescence of DENV probe 1 in different concentration of 0.1 mM (as prepared), 1 μM and 1.1 nM (used amount).

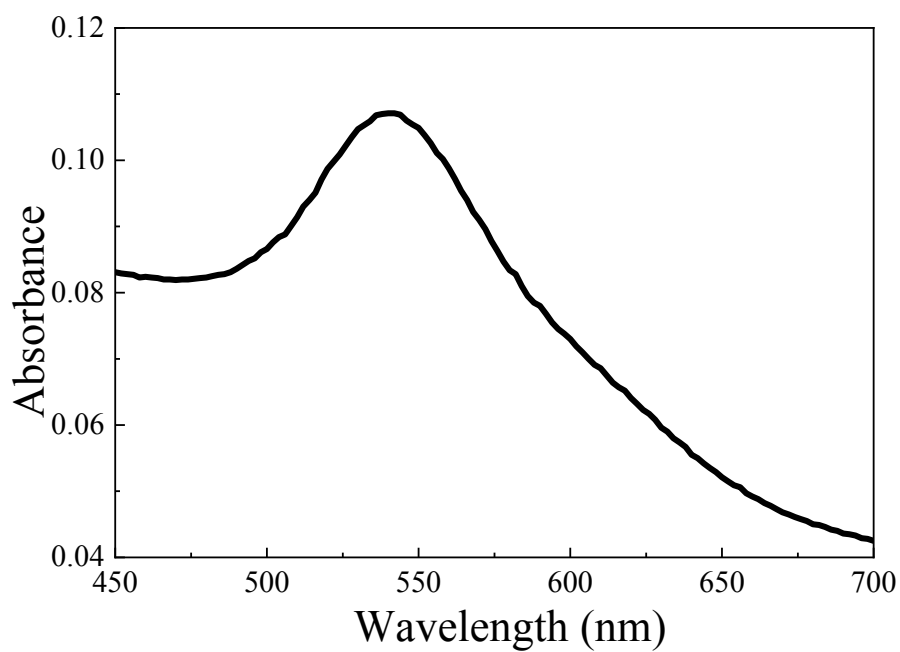

**Fig. S2.** UV-Vis spectrum of CdSeTeS QDs showing peak absorbance at 540 nm.

### Measurement of quantum yield (QY) of CdSeTeS:

The quantum yield (QY) of QDs was measured and calculated by the comparative fluorescence method using fluorescein as a standard fluorophore ( $\Phi = 0.79$ ). Five different concentrations of fluorescein and CdSeTeS QD solutions were prepared using deionized water. Then, the absorbance as well as the corresponding fluorescence curve of each solution was recorded and calculated. Figure S1 shows the linear relationship between fluorescence curve areas and corresponding optical density from absorbance. The quantum yields of CdSeTeS QDs was calculated from the following equation:

$$QY = Q_R [m/m_R][n^2/n_R^2]$$

where  $m$  is the slope of the line obtained from two calibration lines,  $n$  is the refractive index of solvent and subscript  $R$  refers to the reference fluorophore of known QY.

$$QY_{CdSeTeS} = 0.79 \times 6.4/15.3 = 0.33$$

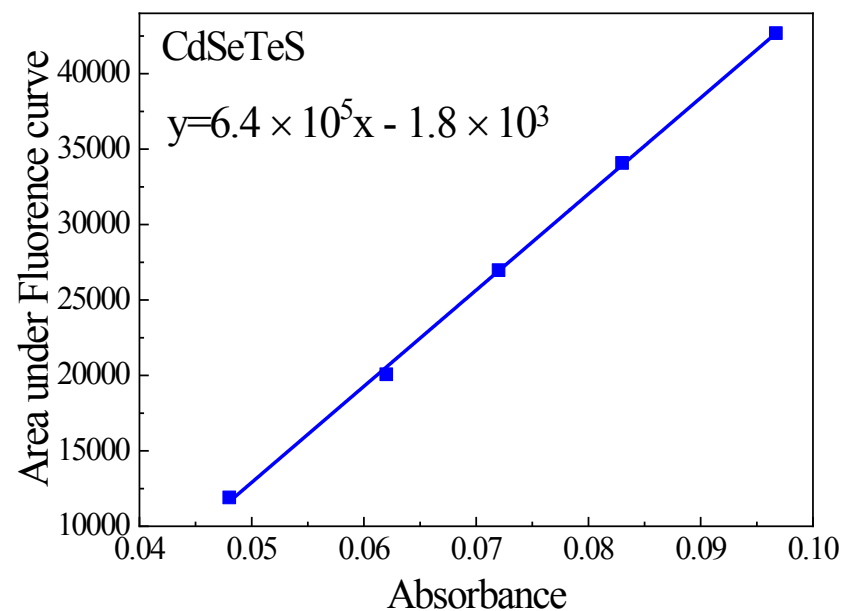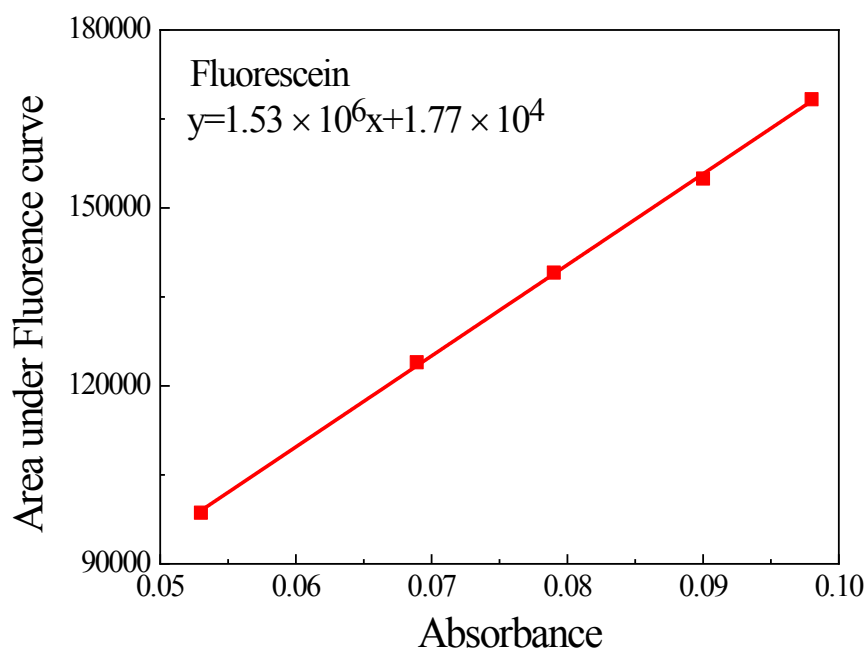

**Fig. S3.** The linear relationship between fluorescence curve areas and corresponding optical density from absorbance. (a) CdSeTeS QDs and (b) fluorescein.



DENV probe 1

Generated by KineFold

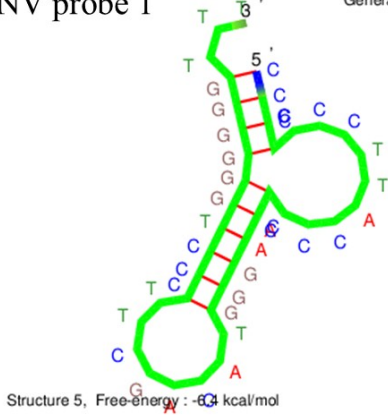

DENV probe 2

Generated by KineFold

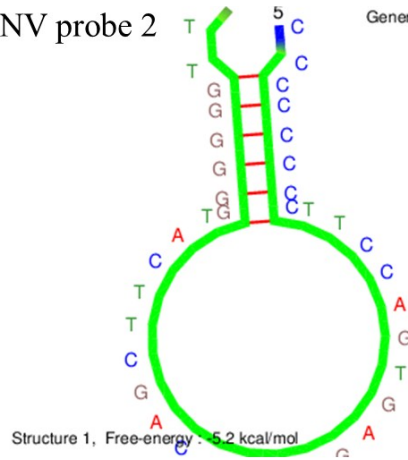

DENV probe 3

Generated by KineFold

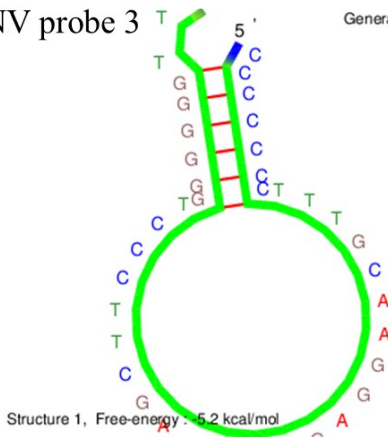

DENV probe 4

Generated by KineFold

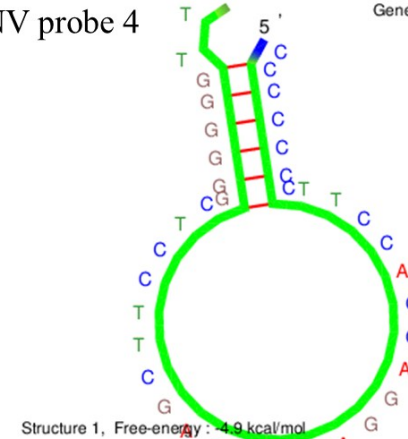

**Fig S4.** The possible secondary structures of all four bare hairpin DNAs.

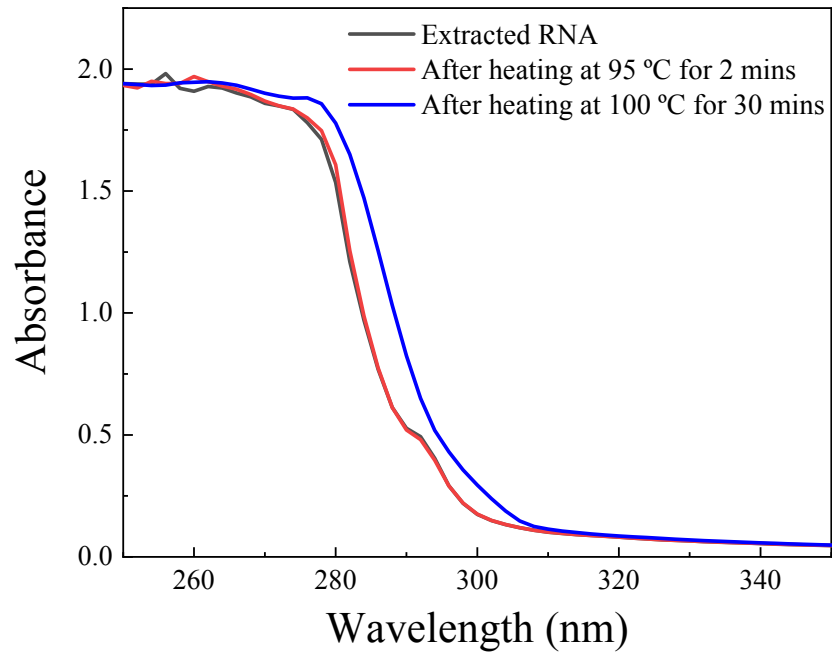

**Fig. S5.** UV-Visible curve of RNAs indicates the stability at 95 °C.

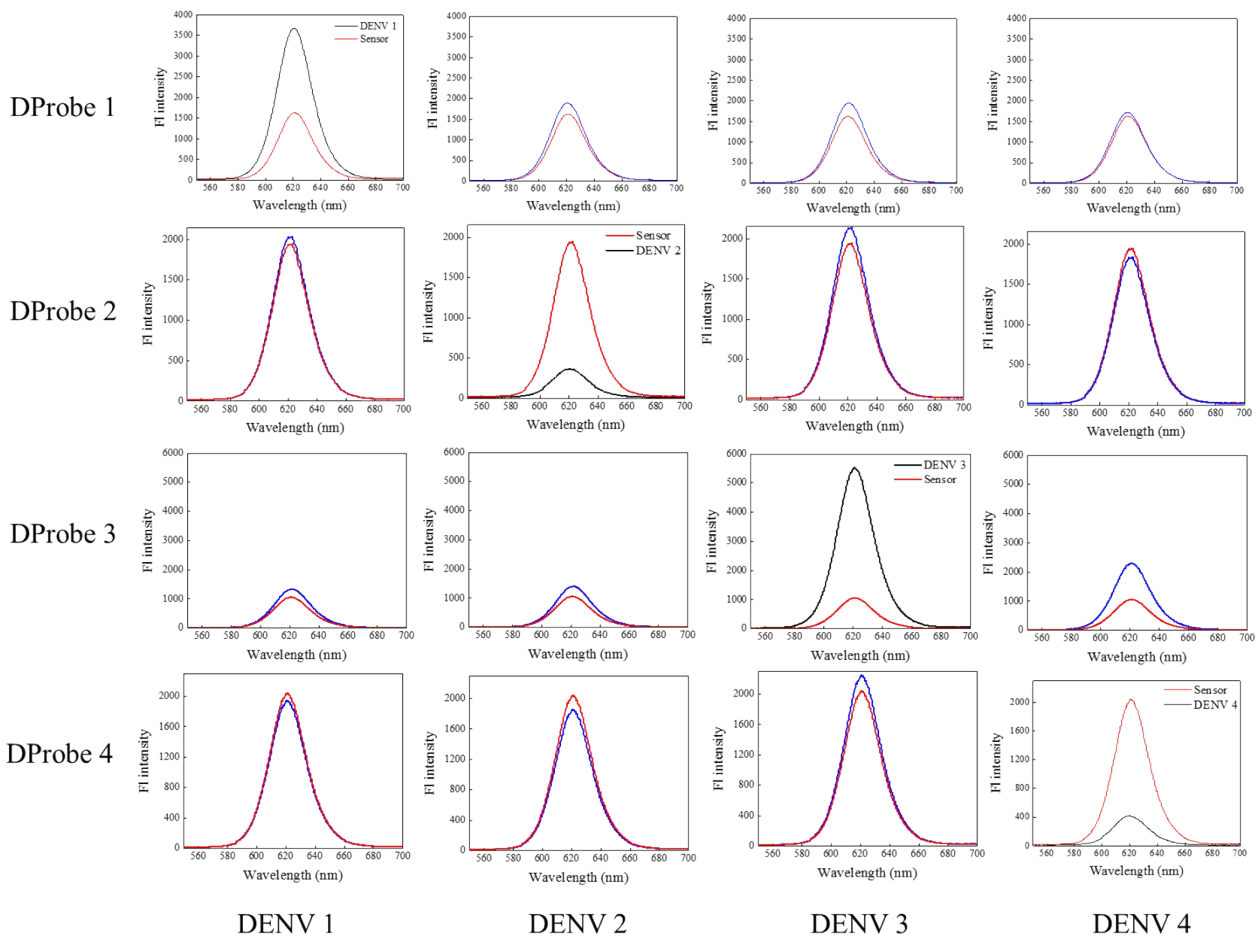

**Fig. S6.** Fluorescence curves of four different DProbes after separately interacts with four different Dengue serotype RNAs.

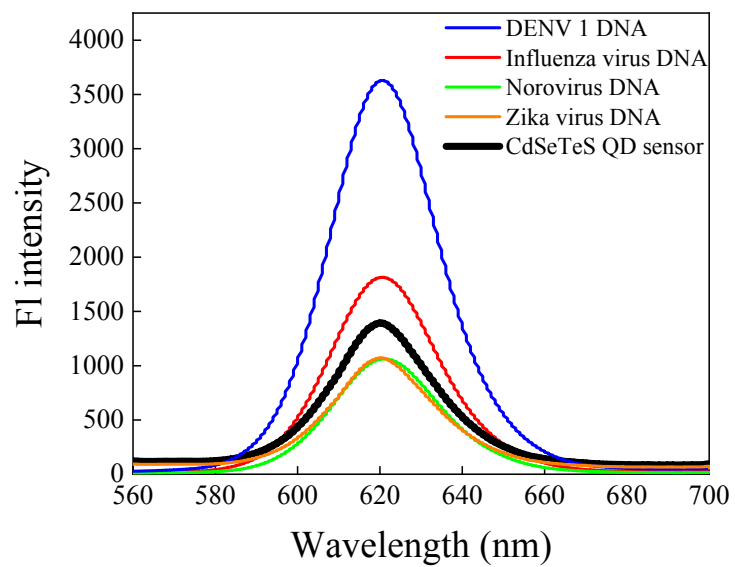

**Fig. S7.** Selectivity test of CdSeTeS QDs with DENV 1 nanoprobe toward  $10^{-9}$  M DENV 1 DNA along with Influenza virus, Zika virus and Norovirus DNAs.
